# 1 **Barriers and Facilitators for the Use of Telehealth by** 2 **Healthcare Providers (HCP) in India - A Scoping Review**

3 *Short title: Telehealth & HCP in India*

4  
5 Parth Sharma<sup>1,2</sup> Shirish Rao<sup>1,3</sup>, Padmavathy Krishna Kumar<sup>1,4</sup>, Aiswarya R Nair<sup>5</sup>, Disha  
6 Agrawal<sup>2</sup>, Siddhesh Zadey<sup>1,6,7,8</sup>, Gayathri S<sup>9</sup>, Rachna George Joseph<sup>9</sup>, Girish Dayma<sup>10</sup>, Liya  
7 Rafeekh<sup>11</sup>, Shubhashis Saha<sup>9</sup>, Sitanshi Sharma<sup>12</sup>, SS Prakash<sup>9</sup>, Venkatesan Sankarapandian<sup>9</sup>,  
8 Preethi John<sup>13</sup>, Vikram Patel<sup>14</sup>

9  
10 1 Association for Socially Applicable Research (ASAR), Pune, Maharashtra, India

11 2 Department of Community Medicine, Maulana Azad Medical College, Delhi, India

12 3 Seth GS Medical College and KEM Hospital, Mumbai, Maharashtra, India

13 4 Adichunchanagiri Institute of Medical Sciences, BG Nagara, Karnataka, India

14 5 Travancore Medical College, Kollam, Kerala, India

15 6 Dr D. Y. Patil Medical College, Hospital, and Research Centre Pune, Dr. D. Y. Patil

16 Vidyapeeth, Pune, Maharashtra, India

17 7 Global Emergency Medicine Innovation and Implementation (GEMINI) Research

18 Center, Duke University School of Medicine, Durham North Carolina USA

19 8 Department of Epidemiology, Columbia University Mailman School of Public Health,

20 New York City New York USA

21 9 Christian Medical College and Hospital, Vellore, Tamil Nadu, India

22 10 KEM Hospital Research Centre, Pune, Maharashtra, India

23 11 Indian Institute of Technology, Kharagpur, West Bengal, India

24 12 Centre for Health Research and Development, Society for applied studies, Delhi, India

25 13 Global Business School for Health, University College London UK

26 14 Harvard T.H. Chan School of Public Health, Boston MA USA

27  
28  
29 For submission to *PLOS Digital Health*

30  
31 **Article Type:** Original Research

32 **Abstract Word Count:** 278

33 **Word Count:** 4368

34 **No. of Figures:** 10

35 **No. of Tables:** 3

36 **Funding:** None

37 **Conflicts of Interest:** None

38

## 39 **Abstract**

40 **Background:** It is widely assumed that telehealth tools like mHealth, telemedicine, and  
41 tele-education can supplement the efficiency of Healthcare Providers (HCPs). We conducted  
42 a scoping review of evidence on the barriers and facilitators associated with the use of  
43 telehealth by HCPs in India.

44

45 **Methods:** A systematic literature search following a pre-registered protocol  
46 (<https://doi.org/10.17605/OSF.IO/KQ3U9> [PROTOCOL DOI]) was conducted in PubMed.  
47 The search strategy, inclusion, and exclusion criteria were based on the World Health  
48 Organization's action framework on Human Resources for Health (HRH) and Universal  
49 Health Coverage in India with a specific focus on telehealth tools. Eligible articles published  
50 in English from 1st January 2001 to 17th February 2022 were included.

51 **Results:** One hundred and six studies were included in the review. Of these, 53 studies  
52 (50%) involved mHealth interventions, 25 (23.6%) involved telemedicine interventions  
53 whereas the remaining 28 (26.4%) involved the use of tele-education interventions by HCPs  
54 in India. In each category, most of the studies followed a quantitative study design and were  
55 mostly published in the last 5 years. The study sites were more commonly present in states  
56 present in south India. The facilitators and barriers related to each type of intervention were  
57 analyzed under the following sub-headings- 1) Human resource related, 2) Application  
58 related 3) Technical, and 4) Others. The interventions were most commonly used for  
59 improving the management of mental health, non-communicable diseases, and maternal and  
60 child health.

61

62 **Conclusions:** Use of telehealth has not been uniformly studied in India. The facilitators  
63 and barriers to telehealth use need to be kept in mind while designing the intervention. Future  
64 studies should focus on looking at region-specific, intervention-specific, and health cadre-  
65 specific barriers and facilitators for the use of telehealth.

66

67 **Keywords:** Digital health, Telehealth, mHealth, Human resources for health

68

69 **Abbreviations**

70 **HCP -Health Care Provider**

71 **UHC - Universal Health Coverage**

72 **HRH - Human Resources for Health**

## 73 **Introduction**

74

75 Telehealth is defined “as the delivery and facilitation of health and health-related services  
76 including medical care, provider and patient education, health information services, and self-  
77 care via telecommunications and digital communication technologies.”(1) Even though used  
78 interchangeably, telehealth and telemedicine are not the same. Telehealth covers a wide range  
79 of services like telemedicine, mHealth, and remote patient monitoring. Telemedicine refers to  
80 the delivery of diagnostic or treatment services to a patient using telecommunication  
81 technology remotely. (1) mHealth on the other hand refers to applications or programs used  
82 on smartphones or tablets. (1) These interventions could be used to address the shortage of  
83 human resources for health (HRH), for education and training of HCPs, or for supporting the  
84 functioning of the existing health workforce.

85

86 Access to healthcare of adequate quality is inequitable in India which disproportionately  
87 affects(2) rural and low-resourced states, where a majority of the Indian population resides.  
88 (3) Access is worse for those belonging to vulnerable groups like the elderly, and people with  
89 disability. (4) A major driver for this inequitable access is the inequitable distribution of  
90 human resources for health (HRH). (5) These barriers have resulted in the rapid privatization  
91 of healthcare in India,(6) thus making healthcare a leading cause of out-of-pocket  
92 expenditure. (7) It is widely assumed that inequitable access to quality care could be  
93 addressed by telehealth interventions like mHealth and telemedicine and also help in cutting  
94 the costs of healthcare. (8–10)

95

96 To enhance the uptake of digital health interventions, the World Health Organization (WHO)  
97 published its Global Strategy on Digital Health for 2020-2025. (11) In India, the National

98 Health Policy (NHP) 2017 recommended the use of Information and Communications  
99 Technologies (ICT) to improve access to health services. In recent years, there has been a  
100 mushrooming of a range of telehealth interventions in India, for example, mSakhi and ASHA  
101 Kirana(12,13) in antenatal and postnatal maternal care through patient monitoring and  
102 behavior change communication; for the care of people with non-communicable diseases(14);  
103 the eSanjeevani telemedicine portal to improve access to care in remote areas(15), and to  
104 train HRH. (16)

105

106 In the context of the significant place occupied by telehealth in national health policy and the  
107 multitude of telehealth interventions being piloted in different sectors and regions of the  
108 country, this review was conducted with the primary objective of understanding the  
109 facilitators, and barriers associated with the use of telehealth tools, like telemedicine, tele-  
110 education and mHealth, by HR in India. We also aimed to look at the role of telehealth in  
111 various aspects of the health system from service delivery, education, and training of HRHs,  
112 to its impact on their functioning and also their attitude toward the intervention.

113

114

## 115 **Methods**

116

### 117 **Overview**

118 This study is a scoping review conducted as one of the components of a larger evidence  
119 synthesis exercise undertaken by the Lancet Citizens' Commission on Reimagining India's  
120 Health System ([www.citizenshealth.in](http://www.citizenshealth.in)). The protocol for evidence synthesis for the entire  
121 HRH workstream was registered on 16th June 2022. (17) It is in compliance with the Arksey

122 and O'Malley methodological framework(18) and the PRISMA-ScR guidelines (19) and can  
123 be accessed here- <https://doi.org/10.17605/OSF.IO/KQ3U9> [PROTOCOL DOI].

124

## 125 **Search Strategy**

126 The review was a part of the larger evidence synthesis work on HRH for UHC in India. The  
127 search was conducted for published literature between 1st January 2001 and 17th February  
128 2022 in the PubMed database. The search strategy focused on the WHO action framework on  
129 HRH and diverse categories of medical professional cadres along with universal health care  
130 in India (**S1 Panel**).

131

## 132 **Screening and Selection**

133 All the articles identified through the search strategy using the above-mentioned database  
134 were added to the Distiller SR software and duplicates were removed. A multi-level  
135 screening of articles using DistillerSR software was carried out by the team as described in  
136 the PRISMA-ScR 2020 diagram (**Fig 1**). Inclusion criteria included studies conducted in  
137 India and reported in English that focused on the use of telehealth by healthcare providers.  
138 Studies only evaluating clinical outcomes but not related to HRH cadre or management  
139 strategies or practices and study protocols, editorials, viewpoints, commentaries, letters, and  
140 correspondences were excluded.

141

142 **Fig 1: PRISMA flowchart showing selection and inclusion of the studies in the review.**

143

144 The articles were divided into a team of two reviewers. At Level 1, the articles were screened  
145 only based on the title and abstract. The articles included by any one reviewer at Level 1  
146 screening were moved to Level 2. The full text of all the articles in Level 2 was reviewed

147 independently by two reviewers. After the full-text screening, articles were finally excluded  
148 or included only if both reviewers were in agreement. Conflicts about the eligibility criteria  
149 were resolved either through consensus between the two reviewers or by consulting one more  
150 reviewer.

151

## 152 **Data extraction and analysis**

153 At Level 3, data charting for all the included full-text articles was done. Charting done by one  
154 author was verified by the other author. The data extracted included the following variables:  
155 Authors, Year of Publication, Study Design, Study Setting, Study Location, HR cadre, HR  
156 practice, Sample Size, Primary Objectives, Primary Outcomes, Impact, Challenges and  
157 barriers, and Study limitations. Articles were then classified based on the type of telehealth  
158 intervention into mHealth, telemedicine, and tele-education. A descriptive analysis of the  
159 included articles was conducted to understand barriers and facilitators of telehealth use.

160

## 161 **Results**

162 One hundred and six studies were included in the review. Of these, 53 studies (50%) involved  
163 mHealth interventions (13,20–71), 25 (23.6%) involved telemedicine interventions (72–96)  
164 whereas the remaining 28 (26.4%) involved the use of tele-education interventions by HCPs  
165 in India. (97–124)

166

### 167 **mHealth**

168

169 Of the total 53 studies, nearly half the studies (45%) were quantitative(21,26–28,31,33–  
170 36,38,39,42,43,45,50,51,53,55,58,59,63,64,66,70), 14 (26%) were qualitative

171 (13,20,22,29,32,37,44,46–48,60,65,67,69), 12 (23%) were mixed-methods (23–  
172 25,30,40,41,52,54,56,57,62,68) and 3 (6%) were review studies.(49,61,71) No study on the  
173 use of mHealth was published before 2013 and 64% (13,20–51,55) of the studies were  
174 published after 2018 with the maximum (n=12, 23%)(13,22,24–31,33,34) number of studies  
175 being published in 2021. The studies were conducted in tertiary care or teaching hospital  
176 settings (n=28)(22,23,26–29,31–38,46,47,49,55–59,61,63,65,68,69,71), community health  
177 centers (n=6)(20,21,42,44,60,66), primary health centers (n=16)(13,30,40,43,48,50–  
178 53)(39,54,62,64,66,67,70), and other settings (n=4). (24,25,41,45) The use of mHealth was  
179 most studied in Karnataka (n=7)(13,28,41,52,66,67,71), followed by Gujarat  
180 (21,38,44,58,65), Maharashtra (26,28,32,49,66), and Tamil Nadu (26,36,37,51,53) (5 studies  
181 each) (**Fig 2**). Findings from all included studies have been summarized in the S1 Table.

182

### 183 **Fig 2: The number of study sites per state in India for mHealth**

184

185 mHealth interventions were most commonly used by doctors (n=38)(21–23,25–27,30,31,35–  
186 38,40–45,47–50,52–54,56–62,64,65,68–71), followed by community healthcare workers  
187 (n=18)(22,28–30,32–34,36,39,41,44,46,49,51,58,63,66,67), nurses  
188 (n=8)(13,20,22,41,42,55,56,68), allied health professionals (n=4)(43,54,68,70), auxiliary  
189 midwife nurses (n=3)(22,36,41), and others (n=8). (24,29,36,46,54,62,64,68)

190

### 191 **1. Facilitators and barriers to the use of mHealth**

192

193 Prior training to use the mHealth intervention  
194 (n=19)(13,20,23,25,26,32,37,41,42,44,46,49,50,52,55,57,60,62,63), interactive intervention  
195 with the use of videos and images (n=14)(21,23,34,39–41,44–46,49,60,67–69), and



196 availability of the device to use the intervention (n=6)(22,23,48,49,58,61) were the most  
197 common human resource-related, application-related, and technical facilitators respectively.  
198 Formative research prior to designing the intervention (n=4)(29,32,44,48) and government  
199 support for the intervention (n=2)(29,30) were other facilitators that were identified. Other  
200 facilitators are mentioned in **Fig 3**.

201

### 202 **Fig 3: Facilitators of use of mHealth**

203

204 Low digital literacy (n=10)(13,22,26,32,38,41,44,46,65,69), malfunctioning of the software  
205 (n=13)(13,20–22,24,25,29,31,37,43,66,67,69), and poor network connectivity (n=14)(20–  
206 22,24,32,34,38,41,44,47,53,55,67,69) were the most common human resource-related,  
207 application-related, and technical barriers respectively. Stigma related to technology  
208 (n=4)(13,38,68,69), worsening of disease-related stigma due to the use of technology  
209 (n=3)(41,55,62), lack of formative research (n=1)(69), and lack of human touch due to the  
210 use of mhealth (n=1)(34) were other barriers that were identified. Other barriers are  
211 mentioned in **Fig 4**.

212

### 213 **Fig 4: Barriers to the use of mHealth**

214

## 215 **2. Role of mHealth**

216

217 The mHealth interventions were most commonly used for improving maternal and child  
218 healthcare (n=24)(13,20,22–25,27,33,34,36,39–43,53,54,59,60,63,64,66–68), followed by  
219 non-communicable diseases like diabetes, hypertension, and cancer  
220 (n=12)(26,28,30,31,46,47,50–52,55,57,65) and mental health (n=6).(21,32,44,49,61,62)

221 Based on the WHO action framework on HRH, 29 (55%) studies focused on Human  
 222 Resource (HR) management and aimed at improving the efficiency of available human  
 223 resources.(13,22–24,28–30,33,35–40,42,43,46,51,54,55,57,58,61,64–67,69,71) Twenty-three  
 224 (43%) studies involved mHealth interventions that aimed at the education and training of  
 225 HCPs.(20,21,25–27,31,32,34,41,44,45,47–50,52,53,59,60,62,63,68,70) Only one study  
 226 looked at the financial aspect of the intervention’s use by the HCPs.(56)

227

### 228 **3. Impact of mHealth Interventions and Attitude of HCPs towards Them**

229

230 The use of mHealth impacted the practice of HCPs in various ways. Improvement in patient  
 231 outcome was reported in 22 studies (20,24,28,33,36,39–43,46,47,49,51,53,54,60–63,69,71),  
 232 improvement in knowledge of HCP in 18 studies  
 233 (13,20,21,23,27,29,36,41,44,45,53,55,59,62,65,68–70), and improvement in work  
 234 performance of HCP in 24 studies (13,20,22,23–25,29,33,38,40,41–43,45,46,48,52–  
 235 54,59,65,67,69,71). Studies also reported an improvement in confidence  
 236 (n=7)(13,20,23,42,46,52,68) and communication (n=7)(13,40,41,43,50,54,58) while using  
 237 mHealth interventions. The other impacts are mentioned in **Table 2**.

238

239

240

241 **Table 2: Impact of telehealth interventions**

|                                 | <b>mHealth</b>                                             | <b>Telemedicine</b>                 | <b>Tele-education</b>               |
|---------------------------------|------------------------------------------------------------|-------------------------------------|-------------------------------------|
| <b>Variable</b>                 | <b>Number of studies<br/>(n=53)</b>                        | <b>Number of studies<br/>(n=25)</b> | <b>Number of studies<br/>(n=28)</b> |
| Improvement in work performance | 24 (13,20,22,23–3<br>25,29,33,38,40,41–<br>43,45,46,48,52– | 3 (76,85,92)                        | 5 (97,101,105,114,124)              |

|                                                                                    |                                                         |                                    |                                                             |
|------------------------------------------------------------------------------------|---------------------------------------------------------|------------------------------------|-------------------------------------------------------------|
|                                                                                    | 54,59,65,67,69,71)                                      |                                    |                                                             |
| Improvement in patient outcome                                                     | 22 (20,24,28,33,36,39–43,46,47,49,51,53,54,60–63,69,71) | 16 (74–78,81,82,85–87,89,91–94,96) | 2 (102,110)                                                 |
| Improvement in knowledge of HCP                                                    | 18 (13,20,21,23,27,29,36,41,44,45,53,55,59,62,65,68–70) | 3 (76,85,89)                       | 17 (97,100,101,104,105,107,108,110,111,114–118,120,122,124) |
| Increases social status/ recognition of work/care seeking/trust/reliability of HCP | 11 (13,22,23,25,36,39–41,43,52,69)                      | 2 (76,82)                          | -                                                           |
| Promotes better communication and relationship between HCP-HCP/HCP - patient       | 7 (13,40,41,43,50,54,58)                                | 2 (76,95)                          | 1 (119)                                                     |
| Increase in confidence                                                             | 7 (13,20,23,42,46,52,68)                                | 1 (76)                             | 5 (104,107,110,111,115)                                     |
| Flexibility to learn offered by the intervention                                   | 7 (21,23,29,31,44,65,70)                                | 1 (83)                             | 4 (116,118,122,123)                                         |
| Saves time                                                                         | 6 (20,41,44,48,52,71)                                   | 3 (87,92,94)                       | -                                                           |
| No diagnostic difference as compared to conventional techniques                    | 3 (47,57,61)                                            | 3 (79,88,92)                       | 1 (124)                                                     |
| Decrease in workload/stress                                                        | 3 (20,39,46)                                            | 2 (76,94)                          | -                                                           |
| Decreases travel                                                                   | 2 (44,56)                                               | 4 (78,91,92,94)                    | 1 (101)                                                     |
| Increased motivation of HCP due to the intervention                                | 2(52,69)                                                | 1(77)                              | 1(122)                                                      |

242

243 Out of the 53 studies, 26 studies reported positive attitudes of HCPs toward mHealth  
 244 interventions (13,22,25,26,29,31,32,34–38,40–46,49,52,53,55,58,68,69) whereas 1 study

245 reported a negative attitude (65) and the remaining did not mention the attitude of the HCP  
 246 toward the intervention. Nine studies reported that the HCP was satisfied with the  
 247 intervention (24,29,31,32,43,54,55,61,68) and in two studies HCP mentioned that they would  
 248 recommend the intervention to others. (23,31)

249

#### 250 **4. Limitations of studies assessing the use of mHealth**

251

252 Studies evaluating the use of mHealth interventions commonly cited inadequate sample size  
 253 (n=10)(21,29,32,38–40,44,62,64,69), poor sampling techniques (n=9)(26,36,38–  
 254 40,44,62,64,69), and incomplete data (n=7)(33,39,40,42,47,50,63) as limitations. Desirability  
 255 bias, as mentioned in 8 studies (20,21,23,25,32,36,39,64), could have resulted in a more  
 256 positive outcome of the interventions being studied. Other limitations of studies are  
 257 mentioned in **Table 3**.

258

259 **Table 3: Limitations of studies included in the review**

|                                                | <b>mHealth</b>                  | <b>Telemedicine</b>             | <b>Tele-education</b>           |
|------------------------------------------------|---------------------------------|---------------------------------|---------------------------------|
| <b>Variable</b>                                | <b>Number of studies (n=53)</b> | <b>Number of studies (n=25)</b> | <b>Number of studies (n=28)</b> |
| Inadequate sample size                         | 10 (21,29,32,38–40,44,62,64,69) | 4 (74,81,85,86)                 | 4 (107,110,111,114)             |
| Poor sampling technique                        | 9 (26,36,38–40,44,62,64,69)     | 2 (72,73)                       | 3 (114,121,123)                 |
| Incomplete data/other data related constraints | 7 (33,39,40,42,47,50,63)        | 2 (74,87)                       | 2 (106,108)                     |
| Poor study design                              | 6 (28,49,51,56,63,65)           | 4 (80–82,96)                    | 2 (109,123)                     |
| Assessed perception only and not hard outcomes | 6 (20,26,31,36,42,62)           | -                               | -                               |

|                                 |                              |        |                 |
|---------------------------------|------------------------------|--------|-----------------|
| Short-term effect only assessed | 2 (31,68)                    | -      | 3 (106,107,116) |
| Short duration of study         | 3 (30,36,43)                 | -      | 1 (115)         |
| Resource constraints            | 2 (23,35)                    | -      | -               |
| Desirability bias               | 8 (20,21,23,25,32,36,39,64)/ | 1 (83) | -               |
| Recall bias                     | 2 (43,56)                    | 1 (73) | -               |
| Hawthorne bias                  | 1 (33)                       | 0      | -               |
| Inappropriate study setting     | 1 (44)                       | -      | -               |

260

## 261 **Telemedicine**

262 Twenty-one studies (84%) were quantitative (72–77,79–82,84–89,91,93–96), 2 (8%) were  
 263 qualitative (78,83), 1 (4%) followed mixed methodology (90) and 1 (4%) was a review  
 264 study.(92) No study on the use of telemedicine by human resources for health (HRH) was  
 265 published before 2011. A majority (64%)(74–78,82,84–87,89,91–93,95,96) of the studies  
 266 were published after 2017 with the maximum (n=5, 20%)(75,77,84,86,91) number of studies  
 267 being published in 2020. Nearly all the studies were conducted in tertiary care settings or  
 268 teaching hospital settings (92%)(72,73,75–88,90–96), and only 1 study each was conducted  
 269 in primary health centers (81), community health centers (73), HIV clinics (74), and non-  
 270 governmental organization clinics. (89) The use of telemedicine interventions was most  
 271 studied in Karnataka (n=5)(72,75,77,94,96) followed by Andhra Pradesh (n=3)(73,76,93) and  
 272 Bihar (n=2).(86,87) (**Fig 5**) Findings from all included studies have been summarized in the  
 273 S2 Table.

274

### 275 **Fig 5: The number of study sites per state in India for telemedicine**

276

277 Telehealth was most commonly used by doctors (n=19)(72–77,79,80,82,83,85–  
278 88,90,91,93,94,96) and focussed more on nurses (n=5)(82,84,86,89,96) than community  
279 healthcare workers (n=3)(72,77,95), allied health professionals (n=2)(72,89), and auxiliary  
280 midwife nurses (n=2). (72,81)

281

## 282 **1. Facilitators and barriers to the use of telemedicine**

283

284 Prior training to use the telemedicine intervention (n=2)(75,93), use of local  
285 language(n=1)(89), and additional technical support (n=1)(76) were identified to be the  
286 human resource-related facilitators. The availability of satellite connectivity (n=1)(88) was a  
287 technical facilitator that improved the uptake of telemedicine. Cost-effectiveness  
288 (n=7)(74,75,78,85,87,93,94), and ease of use of the intervention (n=1)(92) were the  
289 application-related facilitators. (**Fig 6**)

290

### 291 **Fig 6: Facilitators of use of telemedicine**

292

293 Poor network connectivity (n=8)(73,76,81,84,87,92,94,96), difficulty in understanding  
294 English, the language used in the application (n=5)(84,86,87,92,93), and difficulty in  
295 communicating while using telemedicine (n=6)(76,83,86,87,93,95) were the most common  
296 technical, application-related, and human resource-related barriers respectively. Lack of  
297 human touch (n=5)(77,80,83,91,95) and stigma related to technology (n=1)(94) also acted as  
298 barriers to the uptake of telemedicine. Other barriers are mentioned in **Fig 7**.

299

### 300 **Fig 7: Barriers to the use of telemedicine**

301

## 302        **2. Role of telemedicine**

303        Telemedicine was most commonly used for providing treatment for conditions related to  
304        maternal and child health (n=5)(76,80,82,84,86), non-communicable diseases  
305        (n=3)(88,91,94) like diabetes, hypertension, and cancer, and mental health (n=3).(77,78,95)  
306        While most studies focused on improving the efficiency and performance of the HRH  
307        (n=23)(73–89,91–96), 1 study focused on the knowledge and awareness regarding  
308        telemedicine in the HCPs(72) and 1 study addressed the policy and financial aspects of  
309        telemedicine.(90)

310

## 311        **3. Impact of telemedicine interventions and attitude of HCP towards** 312        **them**

313

314        Improvement in patient outcome (n=16)(74–78,81,82,85–87,89,91–94,96), improvement in  
315        knowledge of HCP (n=3)(76,85,89), and improvement in work performance (n=3)(76,85,92)  
316        were associated with the use of telemedicine. It also helped in reducing travel  
317        (n=4)(78,91,92,94) and when used for remote diagnosis, telemedicine showed no significant  
318        diagnostic difference when compared with conventional diagnostic modalities  
319        (n=3)(79,88,92). The other impacts are mentioned in **Table 2**.

320

321        Out of the 25 studies, 13 studies reported positive attitudes of HCPs toward telemedicine  
322        interventions (76–78,83,85–87,91–96) whereas 1 study reported a negative attitude (90) and  
323        the remaining did not mention the attitude of the HCP toward the intervention. Twelve  
324        studies reported that the HCP was satisfied with the intervention (76,77,82–84,86,87,91–  
325        94,96) and in 2 studies HCPs mentioned that they would recommend the intervention to  
326        others. (86,87)

327

#### 328 **4. Limitations of studies assessing the use of telemedicine**

329

330 Inadequate sample size (n=4)(74,81,85,86), poor study design (n=4)(80–82,96), and poor  
331 sampling techniques (n=2)(72,73) were the most commonly cited limitations in the studies  
332 included. Other limitations of studies are mentioned in **Table 3**.

333

#### 334 **Tele-education**

335

336 Twenty-four studies (85.7%) were quantitative (97–102,105–109,111,112,115–124), 2  
337 (7.1%) were qualitative (104,113), 1 (3.6%) followed mixed methodology (114) and 1  
338 (3.6%) was a review study.(103) No study on the use of tele-education was published before  
339 2009. A majority (72%)(97,98,100–102,104–109,111–113,116–118,121–123) of the studies  
340 were published after 2017 with the maximum (n=10, 36%)(97,98,101,106,108,109,117,121–  
341 123) number of studies being published in 2021. Nearly all the studies were conducted in  
342 tertiary care settings or teaching institutes (86%)(98–100,102–107,109–117,119–124), and  
343 only 3 studies were conducted in primary health centers (101,108,118) and 2 in community  
344 health centers. (101,108) The use of tele-education was most studied in Karnataka  
345 (n=4)(100,104,111,112) and Delhi (n=4). (102,111,117,120) (**Fig 8**) Findings from all  
346 included studies have been summarized in the S3 Table.

347

#### 348 **Fig 8: The number of study sites per state in India for tele-education**

349

350 Tele-education services were most commonly meant for doctors (n=16)(97–103,106,109–  
351 111,117–119,121,124) followed by nurses (n=9)(98,105,106,109,111,117,121,122,124),



352 community healthcare workers (n=8)(103–105,107,114–116,123), allied health professionals  
353 (n=5)(98,109,114,121,124), and auxiliary midwife nurses (n=4).(108,111,112,121)

354

## 355 **1. Facilitators and barriers to the use of tele-education**

356

357 Similar to telemedicine, prior training to use the tele-education intervention (n=2)(102,118)  
358 and ease of using the intervention (n=2)(112,122) were the most common human resource-  
359 related, and application-related facilitators respectively. Availability of a device  
360 (n=2)(110,118) was identified to be a technical facilitator. Formative research prior to  
361 designing the intervention (n=1)(104) also helped in increasing its uptake as the formative  
362 research helped in addressing the needs of the participants. (Fig 9)

363

### 364 **Fig 9: Facilitators of use of tele-education**

365

366 Similar to telemedicine, low digital literacy (n=2)(104,115), and poor network connectivity  
367 (n=11)(98–100,103,104,109,111,113,117,120,122) were the most common human resource-  
368 related, and technical barriers respectively. Difficulty in understanding English  
369 (n=2)(111,114), the language commonly used for the applications, and malfunctioning of the  
370 software (n=2)(111,113) were application-related barriers. Other barriers are mentioned in

### 371 **Fig 10.**

372

### 373 **Fig 10: Barriers to the use of tele-education**

374

## 375 **2. Role of tele-education interventions**

376

377 Tele-education services were most commonly used for educating about mental health  
378 disorders (n=9)(97,98,101,102,104,107,109,111,121) followed by non-communicable  
379 diseases like diabetes, hypertension, and cancer (n=4)(100,113,116,118) and maternal and  
380 child healthcare (n=4).(104,114,115,120) Two studies each focused on educating about oral  
381 health problems (105,106) and HIV (110,114) and one study addressed teleteaching for  
382 orthopedics (112), critical care (108), COVID-19 (117), palliative care (122) and  
383 cardiology.(124) Four studies did not mention what tele-education was used  
384 for.(99,103,119,123)

385

### 386 **3. Impact of tele-education Interventions and Attitude of HCP towards** 387 **Them**

388

389 Tele-education resulted in an improvement in knowledge of HCP  
390 (n=17)(97,100,101,104,105,107,108,110,111,114–118,120,122,124) and an improvement in  
391 the work performance of HCP (n=5).(97,101,105,114,124) Its use also resulted in  
392 improvement in the confidence (n=5)(104,107,110,111,115) and communication (n=1)(119)  
393 of HCPs. The other impacts are mentioned in **Table 2**.

394

395 Out of the 28 studies, 15 studies reported positive attitudes of HCPs toward tele-education  
396 interventions (97,100,104,105,108–112,114–116,122–124) whereas 1 study reported a  
397 negative attitude (99) and the remaining did not mention the attitude of the HCP toward the  
398 intervention. Nine studies reported that the HCP was satisfied with the intervention  
399 (97,107,110,111,114,115,119,120,124) and in 3 studies HCP mentioned that they would  
400 recommend the intervention to others.(110,115,122)

401

#### 402           **4. Limitations of studies assessing the use of tele-education**

403

404   Limitations of studies included were similar to the limitations cited by studies that assessed  
405   telemedicine with inadequate sample size (n=4)(107,110,111,114), poor study design  
406   (n=2)(109,123), and poor sampling techniques (n=3)(114,121,123) being the most commonly  
407   cited limitations. Other limitations of studies are mentioned in **Table 3**.

408

409

## 410   **Discussion**

411

412   Following the rapid digitalization of healthcare, mostly following the COVID-19 pandemic,  
413   this scoping review looks at the facilitators and barriers to the application of telehealth for  
414   various health issues in the Indian health system. Even though a wide variety of interventions  
415   in the form of mHealth, telemedicine, and tele-education have been explored, only 8  
416   states/union territories were the sites for most of the interventions. The use of telehealth by  
417   doctors, nurses, and community health workers was commonly addressed and literature on  
418   the use of the same by allied health professionals and non-medical healthcare workers was  
419   limited. Telehealth was most commonly used for HRH management aiming to improve the  
420   efficiency of available human resources. Maternal and child health, non-communicable  
421   diseases like diabetes, hypertension, obstructive airway disease, and cancer, and mental  
422   health were common areas of focus for the use of telehealth. Few studies looked at the use of  
423   telehealth for the provision of acute medical care, follow-up of patients after discharge,  
424   provision, and monitoring of home-based palliative care, and improvement in treatment  
425   compliance of patients with HIV and tuberculosis. Studies conducted globally, have also

426 assessed the utility of telemedicine, mHealth, and tele-education for similar diseases and  
427 conditions as done by the studies in India. (125–127)

428

429 This review brings to light multiple facilitators and barriers to telehealth adoption and use.  
430 The findings could help in the modification of national policies and guidelines which  
431 currently are not very robust. (128) Moreover the facilitators and barriers identified for  
432 mHealth, telemedicine, and tele-education are similar. An understanding of the facilitators  
433 and barriers emphasizes the need for understanding the same at multiple dimensions  
434 especially focusing on the facilitators and barriers related to Human resources for health  
435 (HRH), Infrastructure, and Technology. The facilitators and barriers identified in our review  
436 are similar to those reported previously in the context of telehealth in LMICs. Technical and  
437 infrastructural barriers in the form of internet access, device access, connectivity issues, poor  
438 battery life, and unstable electricity supply contribute to a major road back in implementing  
439 telehealth services in LMICs.(129–131) This is especially important in the context of India,  
440 where over 70% of the population resides in rural areas which are highly vulnerable to the  
441 aforementioned barriers. (132) An increase in network coverage should also be associated  
442 with a push for gender equality as it is seen that women have lesser access to mobile phones  
443 and other technologies. (133) In terms of HRH barriers, previous studies have identified HRH  
444 shortage, insufficient training, and skills, additional workload, lack of motivation lack of  
445 technical support, lack of integration with other government systems, and data safety and  
446 legal concerns.(129–131,134,135) Additionally our study provides deeper insights into  
447 barriers faced by the provider like fear of internet addiction, language barriers, and  
448 malfunction of applications. Barriers concerning the lack of human touch and stigma related  
449 to subpar patient care have also been previously raised by a systematic review conducted by  
450 Kruse C. S. et al.(136) Previous studies have also reported financial barriers in the form of

451 sponsorships and funding, capital expenses for technology start-up and maintenance, and  
452 budget constraints. (129,131)

453

454 In the Indian context, Government support and funding for telehealth interventions have been  
455 found to be an important facilitator for their implementations as reported by 3 studies  
456 included in our review. However, funding towards health overall is still largely limited in  
457 India as only 2.1% of the Gross Domestic Product (GDP) is invested in the public healthcare  
458 sectors. (137) Initiatives like the ‘G-20 Digital Innovation Alliance’ show promise in  
459 encouraging digital health startups by providing grants, sponsorship, and collaboration  
460 opportunities in order to strengthen the telehealth scenario. (138) Previous studies have also  
461 shown that a strong commitment from the governments towards supporting and financing  
462 telehealth has been one the major facilitators. (135) HRH & Application related facilitators in  
463 the form of prior training, technical support, use of local language, and better user interface  
464 which have been shown to be important facilitators (135), were also reported in over one-  
465 third of the studies from our review. Additionally, providing incentives for telehealth use, use  
466 of offline material, balanced overload, and the relationship of CHW with the community  
467 were also found to be other important facilitators in our review. Formative research to  
468 support fit with the context and population was seen as an important facilitator for telehealth  
469 in India; this emphasizes the need for regional research as well as customizing the  
470 intervention as per the setting. Fifteen studies also emphasized the cost-effectiveness of  
471 telehealth interventions, which serve as a vital facilitator in resource-constrained settings like  
472 India.

473

474 Our review reported a strong impact of telehealth on patient care in terms of better patient  
475 outcomes, treatment compliance, and disease knowledge. It reduced travel constraints and

476 improved accessibility for both patients and healthcare providers which has also been shown  
477 to improve the previously mentioned outcomes. (139,140) Specifically for healthcare  
478 workers, a greater number of studies showed that the use of telehealth improved their  
479 performance, confidence, and patient communication. Globally as well, multiple studies have  
480 reported similar positives. (141,142) However, a few studies also highlight contradicting  
481 findings which are multifactorial and scenario-dependent. (143,144) Studies assessing the use  
482 of telehealth diagnostics have also shown promising results in India which are similar to other  
483 studies conducted globally. (127,145–147) Our review also highlights the utility of digital  
484 health interventions in the overall education and skill training of HRH personnel. As shown  
485 by multiple studies conducted during the COVID-19 pandemic, remote learning facilitated by  
486 tele-education has proven to be an effective tool that can be harnessed even after the  
487 pandemic in order to make education and training more convenient and accessible. (145,148–  
488 150)

489

490 The need for decentralized healthcare planning was identified following the Covid-19  
491 pandemic. (7) Our review identifies that with respect to telehealth, the generation of scientific  
492 literature on facilitators and barriers has been concentrated in a few states only. As the  
493 government is pushing for the digitization of healthcare through the Ayushman Bharat Digital  
494 Health Mission (151), it is important to understand the barriers and facilitators not just at the  
495 national level but also at the community level. More comparable evidence needs to be  
496 generated in order to understand local factors affecting the implementation of telehealth in  
497 India.

498

## 499 **Strengths and Limitations**

500

501 A few of the strengths of our studies are the use of a robust search strategy and the inclusion  
502 of a large number of studies. While previous reviews have assessed the overall utility of  
503 telemedicine, our review specifically looks at telehealth, which covers broader interventions,  
504 and its utility in the context of HRH providers. In the Indian context use of mHealth,  
505 telemedicine, and tele-education by community health workers has been an important  
506 highlight of our review. However, the findings of this review must be interpreted in the  
507 context of the following limitations. Firstly, studies included mainly assess the utility of  
508 public health, mHealth, telemedicine, and tele-education portals, while there are multiple  
509 private applications that are usually accessible to upper socioeconomic strata, whose utility  
510 hasn't been assessed. Secondly, since this is a scoping review we only provide a brief  
511 overview of the facilitators and barriers, and an in-depth analysis of study outcomes, meta-  
512 analysis, and critical appraisal of the risk of bias was not performed for the studies included.  
513 Thirdly, while analyzing the number of studies from each state, data was not available for 28  
514 studies, and 8 studies were conducted in multiple states with no mention of the names of the  
515 states involved. Finally, our search strategy, though comprehensive, is limited only to  
516 PubMed, which might have led to the exclusion of a few studies available on other databases  
517 like Scopus and EMBASE.

518

## 519 **Conclusion**

520

521 Use of telehealth has not been studied uniformly across India. Systematic efforts need to be  
522 taken to anticipate and address barriers and implement telehealth intervention in ways to  
523 facilitate its uptake. Future studies should focus on looking at region-specific, intervention-  
524 specific, and health cadre-specific barriers and facilitators for the use of telehealth in order to

525 promote decentralized decision-making for successfully implementing telehealth  
526 interventions in India.

527

## 528 **Acknowledgments**

529 We want to thank Dr. Dipanwita Sengupta, Lancet Citizens' Commission Member for her  
530 support during the review process. We also want to thank Ms. Vashumathi Sriganesh from  
531 QMed Knowledge Foundation, Mumbai for providing her support for building the search  
532 strategy.

## 533 **Supporting Information**

534 S1 Panel: PubMed search strategy

535 S2 Panel: HR Cadres

536 S1 Table: Study characteristics for studies on mHealth as mentioned by the authors.

537 S2 Table: Study characteristics for studies on telemedicine as mentioned by the authors.

538 S3 Table: Study characteristics for studies on tele-education as mentioned by the authors.

539 S4 Table: HRH Framework

540

## 541 **References**

542 1. Catalyst N. What Is Telehealth? NEJM Catal [Internet]. 2018 Feb 1 [cited 2023 Sep 28];

543 Available from: <https://catalyst.nejm.org/doi/full/10.1056/CAT.18.0268>

544 2. Balarajan Y, Selvaraj S, Subramanian SV. Health care and equity in India. Lancet. 2011

545 Feb 5;377(9764):505–15.



- 546 3. Barik D, Thorat A. Issues of Unequal Access to Public Health in India. *Front Public*  
547 *Health*. 2015;3:245.
- 548 4. South India Disability Evidence Study Group, Gudlavalleti MVS, John N, Allagh K, Sagar  
549 J, Kamalakannan S, et al. Access to health care and employment status of people with  
550 disabilities in South India, the SIDE (South India Disability Evidence) study. *BMC*  
551 *Public Health*. 2014 Dec;14(1):1125.
- 552 5. Karan A, Negandhi H, Hussain S, Zapata T, Mairembam D, De Graeve H, et al. Size,  
553 composition and distribution of health workforce in India: why, and where to invest?  
554 *Hum Resour Health*. 2021 Dec;19(1):1–14.
- 555 6. Sengupta A, Nundy S. The private health sector in India. *BMJ*. 2005 Nov  
556 19;331(7526):1157–8.
- 557 7. Pramesh CS, Seshadri DVR, Fernandez E, Rao GN, Dutta M, Mohan P, et al. Healthcare  
558 in post-COVID India: A call for a decentralized healthcare system. *J Fam Med Prim*  
559 *Care*. 2021 Dec;10(12):4337–40.
- 560 8. Sorwar G, Rahamn MM, Uddin R, Hoque MR. Cost and Time Effectiveness Analysis of a  
561 Telemedicine Service in Bangladesh. *Stud Health Technol Inform*. 2016;231:127–34.
- 562 9. Snoswell CL, Taylor ML, Comans TA, Smith AC, Gray LC, Caffery LJ. Determining if  
563 Telehealth Can Reduce Health System Costs: Scoping Review. *J Med Internet Res*.  
564 2020 Oct 19;22(10):e17298.
- 565 10. Cabrera CI, Ning AY, Cai Y, D’Anza B. Systematic Review of Telehealth Cost  
566 Minimization for Patients and Health Systems in Otolaryngology. *The Laryngoscope*.  
567 2021 Aug;131(8):1741–8.

- 568 11. Global strategy on digital health 2020-2025. Geneva: World Health Organization; 2021.  
569 Licence: CC BY-NC-SA 3.0 IGO. Available from: [https://www.who.int/docs/default-](https://www.who.int/docs/default-source/documents/gS4dhdaa2a9f352b0445bafbc79ca799dce4d.pdf)  
570 [source/documents/gS4dhdaa2a9f352b0445bafbc79ca799dce4d.pdf](https://www.who.int/docs/default-source/documents/gS4dhdaa2a9f352b0445bafbc79ca799dce4d.pdf)
- 571 12. Patel AB, Kuhite PN, Alam A, Pusdekar Y, Puranik A, Khan SS, et al. M-SAKHI-  
572 Mobile health solutions to help community providers promote maternal and infant  
573 nutrition and health using a community-based cluster randomized controlled trial in  
574 rural India: A study protocol. *Matern Child Nutr.* 2019 Oct;15(4):e12850.
- 575 13. Srinidhi V, Karachiwala B, Iyer A, Reddy B, Mathrani V, Madhiwalla N, et al. ASHA  
576 Kirana: when digital technology empowered front-line health workers. *BMJ Glob*  
577 *Health.* 2021 Sep;6(Suppl 5):e005039.
- 578 14. Hossain MM, Tasnim S, Sharma R, Sultana A, Shaik AF, Faizah F, et al. Digital  
579 interventions for people living with non-communicable diseases in India: A systematic  
580 review of intervention studies and recommendations for future research and  
581 development. *Digit Health.* 2019 Jan;5:205520761989615.
- 582 15. Markan A, Kishore A, Agarwal A, Akella M, Singh A, Goyal S, et al. Demographic  
583 profile of patients seeking teleophthalmology consultations through e-Sanjeevani:  
584 Retrospective analysis of 5138 patients from North India. *Indian J Ophthalmol.* 2022  
585 Dec;70(12):4238–43.
- 586 16. Panda R, Mishra N, Lahoti S, Prabhu RR, Mishra A, Singh K, et al. Evaluation of  
587 COVID-19 ECHO training program for healthcare workers in India - A Mixed-Method  
588 Study. *BMC Health Serv Res.* 2022 Jul 8;22(1):883.

- 589 17. OSF Registries | A comprehensive scoping review protocol to analyze the evidence on  
590 human resources for health management strategies in India [Internet]. [cited 2023 Sep  
591 28]. Available from: <https://osf.io/kq3u9>
- 592 18. Arksey H, O'Malley L. Scoping studies: towards a methodological framework. *Int J Soc*  
593 *Res Methodol*. 2005 Feb;8(1):19–32.
- 594 19. Tricco AC, Lillie E, Zarin W, O'Brien KK, Colquhoun H, Levac D, et al. PRISMA  
595 Extension for Scoping Reviews (PRISMA-ScR): Checklist and Explanation. *Ann Intern*  
596 *Med*. 2018 Oct 2;169(7):467–73.
- 597 20. Usmanova G, Gresh A, Cohen MA, Kim YM, Srivastava A, Joshi CS, et al.  
598 Acceptability and Barriers to Use of the ASMAN Provider-Facing Electronic Platform  
599 for Peripartum Care in Public Facilities in Madhya Pradesh and Rajasthan, India: A  
600 Qualitative Study Using the Technology Acceptance Model-3. *Int J Environ Res Public*  
601 *Health*. 2020 Nov 11;17(22).
- 602 21. Muke SS, Tugnawat D, Joshi U, Anand A, Khan A, Shrivastava R, et al. Digital  
603 Training for Non-Specialist Health Workers to Deliver a Brief Psychological Treatment  
604 for Depression in Primary Care in India: Findings from a Randomized Pilot Study. *Int J*  
605 *Environ Res Public Health*. 2020 Sep 1;17(17).
- 606 22. Scott K, Ummer O, Chamberlain S, Sharma M, Gharai D, Mishra B, et al. At the  
607 frontlines of digitisation: a qualitative study on the challenges and opportunities in  
608 maintaining accurate, complete and timely digital health records in India's government  
609 health system. *BMJ Open*. 2022 Feb;12(2):e051193.

- 610 23. Bhattacharjya S, Lenker J, Ghosh R. Assessing the usefulness of an mHealth strategy to  
611 support implementation of multi-faceted adaptive feeding interventions by community-  
612 based rehabilitation workers. *Assist Technol.* 2023 May 4;35(3):228–34.
- 613 24. Gupta A, Agrawal R, Gupt A, Guleri R, Bajpayee D, Joshi N, et al. Systems E-approach  
614 for women at risk (SEWA)—A digital health solution for detection of high-risk  
615 pregnancies. *J Fam Med Prim Care.* 2021;10(10):3712.
- 616 25. Charanthimath U, Katageri G, Kinshella MLW, Mallapur A, Goudar S, Ramadurg U, et  
617 al. Community Health Worker Evaluation of Implementing an mHealth Application to  
618 Support Maternal Health Care in Rural India. *Front Glob Womens Health.* 2021 Sep  
619 1;2:645690.
- 620 26. Bairapareddy KC, Alaparathi GK, Jitendra RS, Prathiksha, Rao PP, Shetty V, et al. “We  
621 are so close; yet too far”: perceived barriers to smartphone-based telerehabilitation  
622 among healthcare providers and patients with Chronic Obstructive Pulmonary Disease  
623 in India. *Heliyon.* 2021 Aug;7(8):e07857.
- 624 27. Bashingwa JJH, Shah N, Mohan D, Scott K, Chamberlain S, Mulder N, et al. Examining  
625 the reach and exposure of a mobile phone-based training programme for frontline health  
626 workers (ASHAs) in 13 states across India. *BMJ Glob Health.* 2021 Aug;6(Suppl  
627 5):e005299.
- 628 28. Deo S, Singh P. Community health worker-led, technology-enabled private sector  
629 intervention for diabetes and hypertension management among urban poor: a  
630 retrospective cohort study from large Indian metropolitan city. *BMJ Open.* 2021  
631 Aug;11(8):e045246.

- 632 29. Singh NS, Scott K, George A, LeFevre AE, Ved R. A tale of ‘politics and stars  
633 aligning’: analysing the sustainability of scaled up digital tools for front-line health  
634 workers in India. *BMJ Glob Health*. 2021 Jul;6(Suppl 5):e005041.
- 635 30. Schierhout G, Praveen D, Patel B, Li Q, Mogulluru K, Ameer MA, et al. Why do  
636 strategies to strengthen primary health care succeed in some places and fail in others?  
637 Exploring local variation in the effectiveness of a community health worker managed  
638 digital health intervention in rural India. *BMJ Glob Health*. 2021 Jul;6(Suppl  
639 5):e005003.
- 640 31. Subramanian S, Jose R, Lal A, Augustine P, Jones M, Gopal BK, et al. Acceptability,  
641 Utility, and Cost of a Mobile Health Cancer Screening Education Application for  
642 Training Primary Care Physicians in India. *The Oncologist*. 2021 Dec 1;26(12):e2192–  
643 9.
- 644 32. Khan A, Shrivastava R, Tugnawat D, Singh A, Dimidjian S, Patel V, et al. Design and  
645 Development of a Digital Program for Training Non-specialist Health Workers to  
646 Deliver an Evidence-Based Psychological Treatment for Depression in Primary Care in  
647 India. *J Technol Behav Sci*. 2020 Dec;5(4):402–15.
- 648 33. Usmanova G, Lalchandani K, Srivastava A, Joshi CS, Bhatt DC, Bairagi AK, et al. The  
649 role of digital clinical decision support tool in improving quality of intrapartum and  
650 postpartum care: experiences from two states of India. *BMC Pregnancy Childbirth*.  
651 2021 Dec;21(1):278.
- 652 34. Anand P, Thukral A, Deorari A, National Neonatology Forum Network, Sethi A, Kumar  
653 A, et al. Dissemination of Best Practices in Preterm Care Through a Novel Mobile

- 654 Phone-Based Interactive e-Learning Platform. *Indian J Pediatr.* 2021 Nov;88(11):1068–  
655 74.
- 656 35. Swathi M, Sabeena S, Abdulmajeed J, Pattanaik S, Dsa O, Shubha H, et al.  
657 Development and evaluation of a mobile app for guiding rabies prophylaxis among  
658 health-care professionals in India. *Indian J Community Med.* 2020;45(4):472.
- 659 36. Ward VC, Raheel H, Weng Y, Mehta KM, Dutt P, Mitra R, et al. Impact of mHealth  
660 interventions for reproductive, maternal, newborn and child health and nutrition at scale:  
661 BBC Media Action and the Ananya program in Bihar, India. *J Glob Health.* 2020  
662 Dec;10(2):021005.
- 663 37. Chattopadhyay T, Mondal H, Mondal S, Dutta R, Saha K, Das D. Prescription  
664 digitization, online preservation, and retrieval on a smartphone. *J Fam Med Prim Care.*  
665 2020;9(10):5295.
- 666 38. Harding R, Carrasco JM, Serrano-Pons J, Lemaire J, Namisango E, Luyirika E, et al.  
667 Design and Evaluation of a Novel Mobile Phone Application to Improve Palliative  
668 Home-Care in Resource-Limited Settings. *J Pain Symptom Manage.* 2021 Jul;62(1):1–  
669 9.
- 670 39. Modi D, Saha S, Vaghela P, Dave K, Anand A, Desai S, et al. Costing and Cost-  
671 Effectiveness of a Mobile Health Intervention (ImTeCHO) in Improving Infant  
672 Mortality in Tribal Areas of Gujarat, India: Cluster Randomized Controlled Trial. *JMIR*  
673 *MHealth UHealth.* 2020 Oct 14;8(10):e17066.
- 674 40. Shah P, Madhiwala N, Shah S, Desai G, Dave K, Dholakia N, et al. High uptake of an  
675 innovative mobile phone application among community health workers in rural India:  
676 An implementation study. *Natl Med J India.* 2019;32(5):262.

- 677 41. Suryavanshi N, Kadam A, Kanade S, Gupte N, Gupta A, Bollinger R, et al.  
678 Acceptability and feasibility of a behavioral and mobile health intervention  
679 (COMBIND) shown to increase uptake of prevention of mother to child transmission  
680 (PMTCT) care in India. *BMC Public Health*. 2020 Dec;20(1):752.
- 681 42. Carmichael SL, Mehta K, Srikantiah S, Mahapatra T, Chaudhuri I, Balakrishnan R, et  
682 al. Use of mobile technology by frontline health workers to promote reproductive,  
683 maternal, newborn and child health and nutrition: a cluster randomized controlled Trial  
684 in Bihar, India. *J Glob Health*. 2019 Dec;9(2):0204249.
- 685 43. Modi D, Dholakia N, Gopalan R, Venkatraman S, Dave K, Shah S, et al. mHealth  
686 intervention “ImTeCHO” to improve delivery of maternal, neonatal, and child care  
687 services—A cluster-randomized trial in tribal areas of Gujarat, India. Myers JE, editor.  
688 *PLOS Med*. 2019 Oct 24;16(10):e1002939.
- 689 44. Muke SS, Shrivastava RD, Mitchell L, Khan A, Murhar V, Tugnawat D, et al.  
690 Acceptability and feasibility of digital technology for training community health  
691 workers to deliver brief psychological treatment for depression in rural India. *Asian J*  
692 *Psychiatry*. 2019 Oct;45:99–106.
- 693 45. Khan A, Sebok-Syer SS, Linstadt H, Storm M, Modan N, Bosco MK, et al. An  
694 Electronic-Based Curriculum to Train Acute Care Providers in Rural Haiti and India. *J*  
695 *Grad Med Educ*. 2019 Aug 1;11(4s):152–7.
- 696 46. Jindal D, Roy A, Ajay VS, Yadav SK, Prabhakaran D, Tandon N. Strategies for  
697 Stakeholder Engagement and Uptake of New Intervention: Experience From State-Wide  
698 Implementation of mHealth Technology for NCD Care in Tripura, India. *Glob Heart*.  
699 2019 Jun 1;14(2):165.

- 700 47. Birur Np, Gurushanth K, Patrick S, Sunny S, Raghavan S, Gurudath S, et al. Role of  
701 community health worker in a mobile health program for early detection of oral cancer.  
702 Indian J Cancer. 2019;56(2):107.
- 703 48. Abdel-All M, Angell B, Jan S, Praveen D, Joshi R. The development of an Android  
704 platform to undertake a discrete choice experiment in a low resource setting. Arch  
705 Public Health. 2019 Dec;77(1):20.
- 706 49. Naslund JA, Shidhaye R, Patel V. Digital Technology for Building Capacity of  
707 Nonspecialist Health Workers for Task Sharing and Scaling Up Mental Health Care  
708 Globally. Harv Rev Psychiatry. 2019 May;27(3):181–92.
- 709 50. Peiris D, Praveen D, Mogulluru K, Ameer MA, Raghu A, Li Q, et al. SMARThealth  
710 India: A stepped-wedge, cluster randomised controlled trial of a community health  
711 worker managed mobile health intervention for people assessed at high cardiovascular  
712 disease risk in rural India. Liu G, editor. PLOS ONE. 2019 Mar 26;14(3):e0213708.
- 713 51. Dandge S, Jeemon P, Reddy PS. Technology enabled non-physician health workers  
714 extending telemedicine to rural homes to control hypertension and diabetes (TETRA): A  
715 pre-post demonstration project in Telangana, India. Deserno TM, editor. PLOS ONE.  
716 2019 Feb 19;14(2):e0211551.
- 717 52. Bhatt S, Isaac R, Finkel M, Evans J, Grant L, Paul B, et al. Mobile technology and  
718 cancer screening: Lessons from rural India. J Glob Health. 2018 Dec;8(2):020421.
- 719 53. Shah S, Shinde A, Anand A, Modi D, Desai G, Bhatt H, et al. The role of an MH ealth  
720 intervention in improving knowledge and skills of accredited social health activists in  
721 tribal areas of Gujarat, India: a nested study within an implementation research trial.  
722 Acta Paediatr. 2018 Dec;107(S471):72–9.



- 723 54. Pant Pai N, Daher J, Prashanth H, Shetty A, Sahni RD, Kannangai R, et al. Will an  
724 innovative connected AideSmart! app-based multiplex, point-of-care screening strategy  
725 for HIV and related coinfections affect timely quality antenatal screening of rural Indian  
726 women? Results from a cross-sectional study in India. *Sex Transm Infect.* 2019  
727 Mar;95(2):133–9.
- 728 55. Birur NP, Patrick S, Bajaj S, Raghavan S, Suresh A, Sunny SP, et al. A Novel Mobile  
729 Health Approach to Early Diagnosis of Oral Cancer. *J Contemp Dent Pract.* 2018 Sep  
730 1;19(9):1122–8.
- 731 56. Sharma D, Rohilla L, Bagga R, Srinivasan R, Jindal HA, Sharma N, et al. Feasibility of  
732 implementing cervical cancer screening program using smartphone imaging as a  
733 training aid for nurses in rural India. *Public Health Nurs.* 2018 Nov;35(6):526–33.
- 734 57. Ilozumba O, Dieleman M, Kraamwinkel N, Van Belle S, Chaudoury M, Broerse JEW.  
735 “I am not telling. The mobile is telling”: Factors influencing the outcomes of a  
736 community health worker mHealth intervention in India. Fernandez-Reyes D, editor.  
737 *PLOS ONE.* 2018 Mar 27;13(3):e0194927.
- 738 58. Patterson V, Samant S, Singh MB, Jain P, Agavane V, Jain Y. Diagnosis of epileptic  
739 seizures by community health workers using a mobile app: A comparison with  
740 physicians and a neurologist. *Seizure.* 2018 Feb;55:4–8.
- 741 59. Garner SL, Sudia T, Rachaprolu S. Smart phone accessibility and mHealth use in a  
742 limited resource setting. *Int J Nurs Pract.* 2018 Feb;24(1):e12609.
- 743 60. Prinja S, Nimesh R, Gupta A, Bahuguna P, Gupta M, Thakur JS. Impact of mHealth  
744 application used by community health volunteers on improving utilisation of maternal,

- 745 newborn and child health care services in a rural area of Uttar Pradesh, India. *Trop*  
746 *Med Int Health*. 2017 Jul;22(7):895–907.
- 747 61. Naslund JA, Aschbrenner KA, Araya R, Marsch LA, Unützer J, Patel V, et al. Digital  
748 technology for treating and preventing mental disorders in low-income and middle-  
749 income countries: a narrative review of the literature. *Lancet Psychiatry*. 2017  
750 Jun;4(6):486–500.
- 751 62. Maulik PK, Kallakuri S, Devarapalli S, Vadlamani VK, Jha V, Patel A. Increasing use  
752 of mental health services in remote areas using mobile technology: a pre–post  
753 evaluation of the SMART Mental Health project in rural India. *J Glob Health*. 2017  
754 Jun;7(1):010408.
- 755 63. Balakrishnan R, Gopichandran V, Chaturvedi S, Chatterjee R, Mahapatra T, Chaudhuri  
756 I. Continuum of Care Services for Maternal and Child Health using mobile technology –  
757 a health system strengthening strategy in low and middle income countries. *BMC Med*  
758 *Inform Decis Mak*. 2016 Dec;16(1):84.
- 759 64. Modi D, Patel J, Desai S, Shah P. Accessing completeness of pregnancy, delivery, and  
760 death registration by Accredited Social Health Activists [ASHA] in an innovative  
761 mHealth project in the tribal areas of Gujarat: A cross-sectional study. *J Postgrad Med*.  
762 2016;62(3):170.
- 763 65. Smith R, Menon J, Rajeev JG, Feinberg L, Kumar RK, Banerjee A. Potential for the use  
764 of mHealth in the management of cardiovascular disease in Kerala: a qualitative study.  
765 *BMJ Open*. 2015 Nov 17;5(11):e009367–e009367.

- 766 66. Gera R, Muthusamy N, Bahulekar A, Sharma A, Singh P, Sekhar A, et al. An in-depth  
767 assessment of India's Mother and Child Tracking System (MCTS) in Rajasthan and  
768 Uttar Pradesh. *BMC Health Serv Res*. 2015 Dec;15(1):315.
- 769 67. Modi D, Gopalan R, Shah S, Venkatraman S, Desai G, Desai S, et al. Development and  
770 formative evaluation of an innovative mHealth intervention for improving coverage of  
771 community-based maternal, newborn and child health services in rural areas of India.  
772 *Glob Health Action*. 2015 Dec;8(1):26769.
- 773 68. Thukral A, Joshi M, Joshi P, Prakash V, Adkoli BV, Deorari AK. Apps for Management  
774 of Sick Newborn: Evaluation of Impact on Health Care Professionals. *J Trop Pediatr*.  
775 2014 Oct 1;60(5):370–6.
- 776 69. Jarosławski S, Saberwal G. In eHealth in India today, the nature of work, the challenges  
777 and the finances: an interview-based study. *BMC Med Inform Decis Mak*. 2014  
778 Dec;14(1):1.
- 779 70. Rajasekaran R, Sriman Narayana Iyengar NC. Peer-to-Peer JXTA Architecture for  
780 Continuing Mobile Medical Education Incorporated in Rural Public Health Centers.  
781 *Osong Public Health Res Perspect*. 2013 Apr;4(2):99–106.
- 782 71. Goel S, Bhatnagar N, Sharma D, Singh A. Bridging the Human Resource Gap in  
783 Primary Health Care Delivery Systems of Developing Countries With mHealth:  
784 Narrative Literature Review. *JMIR Mhealth Uhealth*. 2013 Dec 3;1(2):e25.
- 785 72. Zayapragassarazan Z. Awareness, Knowledge, Attitude and Skills of Telemedicine  
786 among Health Professional Faculty Working in Teaching Hospitals. *J Clin Diagn Res*.  
787 2016; Available from: [http://jcd.r.net/article\\_fulltext.asp?issn=0973-  
788 709x&year=2016&volume=10&issue=3&page=JC01&issn=0973-709x&id=7431](http://jcd.r.net/article_fulltext.asp?issn=0973-709x&year=2016&volume=10&issue=3&page=JC01&issn=0973-709x&id=7431)

- 789 73. Lindquist B, Strehlow MC, Rao GVR, Newberry JA. Barriers to Real-Time Medical  
790 Direction via Cellular Communication for Prehospital Emergency Care Providers in  
791 Gujarat, India. *Cureus*. 2016 Jul 8; Available from:  
792 [http://www.cureus.com/articles/4661-barriers-to-real-time-medical-direction-via-](http://www.cureus.com/articles/4661-barriers-to-real-time-medical-direction-via-cellular-communication-for-prehospital-emergency-care-providers-in-gujarat-india)  
793 [cellular-communication-for-prehospital-emergency-care-providers-in-gujarat-india](http://www.cureus.com/articles/4661-barriers-to-real-time-medical-direction-via-cellular-communication-for-prehospital-emergency-care-providers-in-gujarat-india)
- 794 74. Rout SK, Gabhale YR, Dutta A, Balakrishnan S, Lala MM, Setia MS, et al. Can  
795 telemedicine initiative be an effective intervention strategy for improving treatment  
796 compliance for pediatric HIV patients: Evidences on costs and improvement in  
797 treatment compliance from Maharashtra, India. Beck EJ, editor. *PLOS ONE*. 2019 Oct  
798 8;14(10):e0223303.
- 799 75. Gupta N, Chawla N, Gupta D, Dhawan N, Janaki VR. Community Triage of Otolaryngology  
800 Patients Using a Store-and-Forward Telemedicine Device: A Feasibility Study. *Ear  
801 Nose Throat J*. 2020 Mar 22;014556132090895.
- 802 76. Thakar S, Rajagopal N, Mani S, Shyam M, Aryan S, Rao AS, et al. Comparison of  
803 telemedicine with in-person care for follow-up after elective neurosurgery: results of a  
804 cost-effectiveness analysis of 1200 patients using patient-perceived utility scores.  
805 *Neurosurg Focus*. 2018 May;44(5):E17.
- 806 77. Ravindran S, P LN, Channaveerachari NK, Seshadri SP, Kasi S, Manikappa SK, et al.  
807 Crossing barriers: Role of a tele-outreach program addressing psychosocial needs in the  
808 midst of COVID-19 pandemic. *Asian J Psychiatry*. 2020 Oct;53:102351.
- 809 78. Manjunatha N, Kumar C, Math S, Thirthalli J. Designing and implementing an  
810 innovative digitally driven primary care psychiatry program in India. *Indian J  
811 Psychiatry*. 2018;60(2):236.

- 812 79. Patro B, Tripathy J, De D, Sinha S, Singh A, Kanwar A. Diagnostic agreement between  
813 a primary care physician and a teledermatologist for common dermatological conditions  
814 in North India. *Indian Dermatol Online J.* 2015;6(1):21.
- 815 80. Mohanan M, Babiarz KS, Goldhaber-Fiebert JD, Miller G, Vera-Hernández M. Effect  
816 Of A Large-Scale Social Franchising And Telemedicine Program On Childhood  
817 Diarrhea And Pneumonia Outcomes In India. *Health Aff (Millwood).* 2016  
818 Oct;35(10):1800–9.
- 819 81. Keeppanasserril A, Mathew A, Muddappa SC. Effectiveness of Tele-guided Interceptive  
820 Prosthodontic treatment in rural India: A comparative pilot study. *Online J Public  
821 Health Inform.* 2011 Nov 7;3(2). Available from:  
822 <http://www.uic.edu/htbin/cgiwrap/bin/ojs/index.php/ojphi/article/view/3800>
- 823 82. Patel A, Kuhite P, Puranik A, Khan SS, Borkar J, Dhande L. Effectiveness of weekly  
824 cell phone counselling calls and daily text messages to improve breastfeeding indicators.  
825 *BMC Pediatr.* 2018 Dec;18(1):337.
- 826 83. Acharya R, Rai J. Evaluation of patient and doctor perception toward the use of  
827 telemedicine in Apollo Tele Health Services, India. *J Fam Med Prim Care.*  
828 2016;5(4):798.
- 829 84. Panda PK, Dawman L, Panda P, Sharawat IK. Feasibility and effectiveness of  
830 teleconsultation in children with epilepsy amidst the ongoing COVID-19 pandemic in a  
831 resource-limited country. *Seizure.* 2020 Oct;81:29–35.
- 832 85. Khanna M, Gowda GS, Bagevadi VI, Gupta A, Kulkarni K, Shyam RPS, et al.  
833 Feasibility and Utility of Tele-Neurorehabilitation Service in India: Experience from a  
834 Quaternary Center. *J Neurosci Rural Pract.* 2018 Oct;09(04):541–4.

- 835 86. Ragesh G, Ganjekar S, Thippeswamy H, Desai G, Hamza A, Chandra PS. Feasibility,  
836 Acceptability and Usage Patterns of a 24-Hour Mobile Phone Helpline Service for  
837 Women Discharged from a Mother-Baby Psychiatry Unit (MBU) in India. *Indian J*  
838 *Psychol Med.* 2020 Nov;42(6):530–4.
- 839 87. Verma N, Mishra S, Singh S, Kaur R, Kaur T, De A, et al. Feasibility, Outcomes, and  
840 Safety of Telehepatology Services During the COVID-19 Pandemic. *Hepatol*  
841 *Commun.* 2022 Jan;6(1):65–76.
- 842 88. Raman R, Bhojwani DN, Sharma T. How accurate is the diagnosis of diabetic  
843 retinopathy on telescreening? The Indian scenario. *Rural Remote Health.*  
844 2014;14(4):2809.
- 845 89. Ramkumar V, Nagarajan R, Shankarnarayan VC, Kumaravelu S, Hall JW.  
846 Implementation and evaluation of a rural community-based pediatric hearing screening  
847 program integrating in-person and tele-diagnostic auditory brainstem response (ABR).  
848 *BMC Health Serv Res.* 2019 Dec;19(1):1.
- 849 90. Meher SK, Biswas A, Ratha BK. Legal issues among doctors in the implementation of  
850 teleconsultation: a study at AIIMS, New Delhi, India. *Stud Health Technol Inform.*  
851 2013;192:1107.
- 852 91. Biswas S, Adhikari S, Gupta N, Garg R, Bharti S, Kumar V, et al. Smartphone-based  
853 telemedicine service at palliative care unit during nationwide lockdown: Our initial  
854 experience at a tertiary care cancer hospital. *Indian J Palliat Care.* 2020;26(5):31.
- 855 92. Angral S, Varshney S, Aanand P, Raj R. Tele Otology in India: Last 10 Years—A  
856 Scopic Review. *Indian J Otolaryngol Head Neck Surg.* 2022 Dec;74(S3):3776–88.

- 857 93. Ganapathy K, Alagappan D, Rajakumar H, Dhanapal B, Rama Subbu G, Nukala L, et al.  
858 Tele-Emergency Services in the Himalayas. *Telemed E-Health*. 2019 May;25(5):380–  
859 90.
- 860 94. Ganapathy K, Chawdhry V, Premanand S, Sarma A, Chandralekha J, Kumar KY, et al.  
861 Telemedicine in the Himalayas: Operational Challenges—A Preliminary Report.  
862 *Telemed E-Health*. 2016 Oct;22(10):821–35.
- 863 95. Naik SS, Rahul P, Harihara S, Pahuja E, Chithra NK, Ramachandraiah S, et al.  
864 Telephonic follow-up during COVID-19 to maintain continuity of care for persons with  
865 psychiatric disorders. *Asian J Psychiatry*. 2021 Mar;57:102564.
- 866 96. Nair PP, Aghoram R, Thomas B, Bharadwaj B, Chinnakali P. Video teleconsultation  
867 services for persons with epilepsy during COVID-19 pandemic: An exploratory study  
868 from public tertiary care hospital in Southern India on feasibility, satisfaction, and  
869 effectiveness. *Epilepsy Behav*. 2021 Apr;117:107863.
- 870 97. Philip S, Patley R, Chander R, Varshney P, Dosajh AC, Vinay B, et al. A report on  
871 successful introduction of tele mental health training for primary care doctors during the  
872 COVID 19 pandemic. *Asian J Psychiatry*. 2022 Feb;68:102967.
- 873 98. Shiva L, Desai G, Chand P, Ganjekar S, Vaiphei K, Satyanarayana VA, et al. A virtual  
874 course in perinatal mental health for healthcare professionals. *Asian J Psychiatry*. 2021  
875 Aug;62:102746.
- 876 99. Balasubramaniam SM, Bhargava S, Agrawal N, Asif R, Chawngthu L, Sinha P, et al.  
877 Blending virtual with conventional learning to improve student midwifery skills in  
878 India. *Nurse Educ Pract*. 2018 Jan;28:163–7.

- 879 100. Dhanasekaran K, Babu R, Kumar V, Mehrotra R, Hariprasad R. Capacity Building of  
880 Gynecologists in Cancer Screening Through Hybrid Training Approach. *J Cancer Educ.*  
881 2020 Dec;35(6):1243–9.
- 882 101. Ibrahim FA, Malathesh BC, Gajera G, Pandey P, Nirisha P L, Jyrwa S, et al.  
883 Chhattisgarh community mental healthcare tele-mentoring program (CHaMP): Digitally  
884 driven initiative to reach the unreached. *Int J Soc Psychiatry.* 2022 Aug;68(5):954–7.
- 885 102. Pahuja E, Kumar S, Kumar A, Uzzafar F, Sarkar S, Manjunatha N, et al. Collaborative  
886 Video Consultations from Tertiary Care Based Telepsychiatrist to a Remote Primary  
887 Care Doctor to Manage Opioid Substitution Therapy Clinic. *J Neurosci Rural Pract.*  
888 2020 Jun 12;11:498–501.
- 889 103. Mahapatra AK, Mishra SK, Kapoor L, Singh IP. Critical Issues in Medical Education  
890 and the Implications for Telemedicine Technology. *Telemed E-Health.* 2009  
891 Jul;15(6):592–6.
- 892 104. Lakshminarayanan M, Kathuria N, Mehra S. Delivery of perinatal mental health  
893 services by training lay counselors using digital platforms. *Asian J Psychiatry.* 2020  
894 Dec;54:102277.
- 895 105. Kumar Pm, Gottumukkala SruthimaNVS, Ramesh KsV, Bharath Ts, Penmetsa G,  
896 Kumar Cn. Effect of e-learning methods on Dental education: An observational study. *J*  
897 *Educ Health Promot.* 2020;9(1):235.
- 898 106. Priya H, Kharbanda OP, Agarwal D, Ivaturi A, Ravi P, Gupta A, et al. Effectiveness of a  
899 web-based learning module on oral health promotion for nursing and allied health  
900 professionals. *Natl Med J India.* 2021 Aug;34(4):232–4.



- 901 107. Mehrotra K, Chand P, Bandawar M, Rao Sagi M, Kaur S, G A, et al. Effectiveness of  
902 NIMHANS ECHO blended tele-mentoring model on Integrated Mental Health and  
903 Addiction for counsellors in rural and underserved districts of Chhattisgarh, India. *Asian*  
904 *J Psychiatry*. 2018 Aug;36:123–7.
- 905 108. Gautam S, Shukla A, Mishra N, Kohli M, Singh G. Effectiveness of virtual training for  
906 medical officers and community health officers in the critical care management of  
907 COVID-19 patients in the intensive care unit. *Indian J Anaesth*. 2021;65(16):168.
- 908 109. Manjunatha N, Sadh K, Shashidhara H, Manjunatha B, Shashank H, Ashwatha Kp, et al.  
909 Establishing performance indicators of telemedicine-based “On-Consultation Training”  
910 of primary care doctors: An innovation to integrate psychiatry at primary care. *Indian J*  
911 *Community Med*. 2021;46(1):75.
- 912 110. Chang LW, Kadam DB, Sangle S, Narayanan S, Borse RT, McKenzie-White J, et al.  
913 Evaluation of a Multimodal, Distance Learning HIV Management Course for Clinical  
914 Care Providers in India. *J Int Assoc Physicians AIDS Care*. 2012 Oct;11(5):277–82.
- 915 111. Sagi M, Aurobind G, Chand P, Ashfak A, Karthick C, Kubenthiran N, et al. Innovative  
916 telementoring for addiction management for remote primary care physicians: A  
917 feasibility study. *Indian J Psychiatry*. 2018;60(4):461.
- 918 112. Barik S, Paul S, Kandwal P. Insight into the changing patterns in clinical and academic  
919 activities of the orthopedic residents during COVID-19 pandemic: a cross-sectional  
920 survey. *Knee Surg Sports Traumatol Arthrosc*. 2020 Oct;28(10):3087–93.
- 921 113. Babu R, Dhanasekaran K, Mehrotra R, Hariprasad R. Leveraging Technology for  
922 Nation-Wide Training of Healthcare Professionals in Cancer Screening in India: a  
923 Methods Article. *J Cancer Educ*. 2021 Oct;36(5):950–6.

- 924 114. Ramanathan R, Aldis R, Gupta S, Desai M, Bollinger RC, Reed VA. Mixed methods  
925 evaluation of an international internet-based continuing medical education course for  
926 pediatric HIV providers in Pune, India. *Educ Health Abingdon Engl*. 2011  
927 Apr;24(1):540.
- 928 115. Thukral A, Sasi A, Chawla D, Datta P, Wahid S, Rao S, et al. Online Neonatal Training  
929 and Orientation Programme in India (ONTOP-IN)--The Way Forward for Distance  
930 Education in Developing Countries. *J Trop Pediatr*. 2012 Dec 1;58(6):486–90.
- 931 116. Nethan ST, Hariprasad R, Babu R, Kumar V, Sharma S, Mehrotra R. Project ECHO: a  
932 Potential Best-Practice Tool for Training Healthcare Providers in Oral Cancer Screening  
933 and Tobacco Cessation. *J Cancer Educ*. 2020 Oct;35(5):965–71.
- 934 117. Rao S, Rohilla KK, Kathrotia R, Naithani M, Varghese A, Bahadur A, et al. Rapid  
935 Workforce Development to Combat the COVID-19 Pandemic: Experience From a  
936 Tertiary Health Care Centre in North India. *Cureus*. 2021 Jun 11; Available from:  
937 [https://www.cureus.com/articles/59334-rapid-workforce-development-to-combat-the-](https://www.cureus.com/articles/59334-rapid-workforce-development-to-combat-the-covid-19-pandemic-experience-from-a-tertiary-health-care-centre-in-north-india)  
938 [covid-19-pandemic-experience-from-a-tertiary-health-care-centre-in-north-india](https://www.cureus.com/articles/59334-rapid-workforce-development-to-combat-the-covid-19-pandemic-experience-from-a-tertiary-health-care-centre-in-north-india)
- 939 118. Hariprasad R, Arora S, Babu R, Sriram L, Sardana S, Hanumappa S, et al. Retention of  
940 Knowledge Levels of Health Care Providers in Cancer Screening Through  
941 Telementoring. *J Glob Oncol*. 2018 Dec;(4):1–7.
- 942 119. Mahadevan S, Muralidhar K, Shetty D. Tele-Education Service Using Telemedicine  
943 Network in Healthcare Industry. *Telemed E-Health*. 2012 Nov;18(9):699–702.
- 944 120. Jain A, Agarwal R, Chawla D, Paul V, Deorari A. Tele-education vs classroom training  
945 of neonatal resuscitation: a randomized trial. *J Perinatol*. 2010 Dec;30(12):773–9.

- 946 121. Orsolini L, Jatchavala C, Noor IM, Ransing R, Satake Y, Shoib S, et al. Training and  
947 education in digital psychiatry: A perspective from ASIA-PACIFIC region. *Asia-Pac*  
948 *Psychiatry*. 2021 Dec;13(4):e12501.
- 949 122. Doherty M, Rayala S, Evans E, Rowe J, Rapelli V, Palat G. Using Virtual Learning to  
950 Build Pediatric Palliative Care Capacity in South Asia: Experiences of Implementing a  
951 Teleteaching and Mentorship Program (Project ECHO). *JCO Glob Oncol*. 2021  
952 Dec;(7):210–22.
- 953 123. Bhattarai D, Sharma A, Sengupta P. Utility and perceptions about web-based academics  
954 among physicians during COVID-19 pandemic. *J Fam Med Prim Care*. 2021;10(2):699.
- 955 124. Bansal M, Singh S, Maheshwari P, Adams D, McCulloch ML, Dada T, et al. Value of  
956 Interactive Scanning for Improving the Outcome of New-Learners in Transcontinental  
957 Tele-Echocardiography (VISION-in-Tele-Echo) Study. *J Am Soc Echocardiogr*. 2015  
958 Jan;28(1):75–87.
- 959 125. Braun R, Catalani C, Wimbush J, Israelski D. Community Health Workers and Mobile  
960 Technology: A Systematic Review of the Literature. Bullen C, editor. *PLoS ONE*. 2013  
961 Jun 12;8(6):e65772.
- 962 126. Deldar K, Bahaadinbeigy K, Tara SM. Teleconsultation and Clinical Decision Making:  
963 a Systematic Review. *Acta Inform Medica AIM J Soc Med Inform Bosnia Herzeg Cas*  
964 *Drustva Za Med Inform BiH*. 2016 Jul 16;24(4):286–92.
- 965 127. Lee Y, Raviglione MC, Flahault A. Use of Digital Technology to Enhance Tuberculosis  
966 Control: Scoping Review. *J Med Internet Res*. 2020 Feb 13;22(2):e15727.

- 967 128. Sharma P, Sethi MIS, Liem A, Bhatti HBS, Pandey V, Nair A. A Review of  
968 Telemedicine Guidelines in the South-East Asia Region. *Telemed Rep.* 2023 Sep  
969 1;4(1):271–8.
- 970 129. Al-Samarraie H, Ghazal S, Alzahrani AI, Moody L. Telemedicine in Middle Eastern  
971 countries: Progress, barriers, and policy recommendations. *Int J Med Inf.* 2020  
972 Sep;141:104232.
- 973 130. Bedi G, Vyas KS, Chung MT, Morrison SD, Asaad M, Mardini S. Telemedicine in  
974 International Cleft Care: A Systematic Review. *Cleft Palate-Craniofacial J Off Publ Am*  
975 *Cleft Palate-Craniofacial Assoc.* 2021 Dec;58(12):1547–55.
- 976 131. Dodoo JE, Al-Samarraie H, Alzahrani AI. Telemedicine use in Sub-Saharan Africa:  
977 Barriers and policy recommendations for Covid-19 and beyond. *Int J Med Inf.* 2021  
978 Jul;151:104467.
- 979 132. NSS 75th Round. Key Indicators of Social Consumption in India: Health. 2019 Nov,  
980 Available from:  
981 [https://www.mospi.gov.in/sites/default/files/NSS75250H/KI\\_Health\\_75th\\_Final.pdf](https://www.mospi.gov.in/sites/default/files/NSS75250H/KI_Health_75th_Final.pdf)
- 982 133. Joshi A, Malhotra B, Amadi C, Loomba M, Misra A, Sharma S, et al. Gender and the  
983 Digital Divide Across Urban Slums of New Delhi, India: Cross-Sectional Study. *J Med*  
984 *Internet Res.* 2020 Jun 22;22(6):e14714.
- 985 134. Sagaro GG, Battineni G, Amenta F. Barriers to Sustainable Telemedicine  
986 Implementation in Ethiopia: A Systematic Review. *Telemed Rep.* 2020;1(1):8–15.

- 987 135. Ag Ahmed MA, Gagnon MP, Hamelin-Brabant L, Mbemba GIC, Alami H. A mixed  
988 methods systematic review of success factors of mhealth and telehealth for maternal  
989 health in Sub-Saharan Africa. *mHealth*. 2017;3:22.
- 990 136. Kruse CS, Williams K, Bohls J, Shamsi W. Telemedicine and health policy: A  
991 systematic review. *Health Policy Technol*. 2021 Mar;10(1):209–29.
- 992 137. Share of government expenditure in total health expenditure increases from 28.6 per  
993 cent in FY14 to 40.6 per cent in. Available from:  
994 <https://pib.gov.in/pib.gov.in/Pressreleaseshare.aspx?PRID=1894902>
- 995 138. Call for proposals “the G20 Digital Innovation Alliance (G20-DIA) to recognize and  
996 support innovators that have digital solutions” by the MEITY | Principal Scientific  
997 Adviser. Available from: [https://www.psa.gov.in/innerPage/psa-initiatives-covid/call-](https://www.psa.gov.in/innerPage/psa-initiatives-covid/call-proposals-g20-digital-innovation-alliance-g20-dia-recognize-and-support/4475)  
998 [proposals-g20-digital-innovation-alliance-g20-dia-recognize-and-support/4475](https://www.psa.gov.in/innerPage/psa-initiatives-covid/call-proposals-g20-digital-innovation-alliance-g20-dia-recognize-and-support/4475)
- 999 139. Haleem A, Javaid M, Singh RP, Suman R. Telemedicine for healthcare: Capabilities,  
1000 features, barriers, and applications. *Sens Int*. 2021;2:100117.
- 1001 140. Goldenberg MG, Grantcharov TP. Enhancing Clinical Performance and Improving  
1002 Patient Safety Using Digital Health. In: Rivas H, Wac K, editors. *Digital Health:  
1003 Scaling Healthcare to the World*. Cham: Springer International Publishing; 2018. p.  
1004 235–48. (Health Informatics). Available from: [https://doi.org/10.1007/978-3-319-](https://doi.org/10.1007/978-3-319-61446-5_17)  
1005 [61446-5\\_17](https://doi.org/10.1007/978-3-319-61446-5_17)
- 1006 141. Owoyemi A, Osuchukwu JI, Azubuike C, Ikpe RK, Nwachukwu BC, Akinde CB, et al.  
1007 Digital Solutions for Community and Primary Health Workers: Lessons From  
1008 Implementations in Africa. *Front Digit Health*. 2022 Jun 3;4:876957.

- 1009 142. Bronsoler A, Doyle J. The Impact of New Technology on the Healthcare Workforce.
- 1010 143. Gupta N, Gupta MK, Joshi NK, Mantri N, Sridevi G, Patel M, et al. Is telemedicine a  
1011 holy grail in healthcare policy: clinicians' and patients' perspectives from an Apex  
1012 Institution in Western India. *BMC Health Serv Res.* 2023 Feb 15;23(1):161.
- 1013 144. Zhu L, Jiang X, Cao J. Factors Affecting Continuance Intention in Non-Face-to-Face  
1014 Telemedicine Services: Trust Typology and Privacy Concern Perspectives. *Healthcare.*  
1015 2023 Jan 28;11(3):374.
- 1016 145. Senbekov M, Saliev T, Bukeyeva Z, Almabayeva A, Zhanaliyeva M, Aitenova N, et al.  
1017 The Recent Progress and Applications of Digital Technologies in Healthcare: A Review.  
1018 Fayn J, editor. *Int J Telemed Appl.* 2020 Dec 3;2020:1–18.
- 1019 146. Deldar K, Bahaadinbeigy K, Tara SM. Teleconsultation and Clinical Decision Making:  
1020 a Systematic Review. *Acta Inform Medica AIM J Soc Med Inform Bosnia Herzeg Cas*  
1021 *Drustva Za Med Inform BiH.* 2016 Jul 16;24(4):286–92.
- 1022 147. Almubarak H. The Potential Role of Telemedicine in Early Detection of Oral Cancer: A  
1023 Literature Review. *J Pharm Bioallied Sci.* 2022 Jul;14(Suppl 1):S19–23.
- 1024 148. Barteit S, Guzek D, Jahn A, Bärnighausen T, Jorge MM, Neuhann F. Evaluation of e-  
1025 learning for medical education in low- and middle-income countries: A systematic  
1026 review. *Comput Educ.* 2020 Feb;145:103726.
- 1027 149. Gross G, Ling R, Richardson B, Quan N. In-Person or Virtual Training?: Comparing the  
1028 Effectiveness of Community-Based Training. *Am J Distance Educ.* 2023 Jan  
1029 2;37(1):66–77.

- 1030 150. Vaona A, Banzi R, Kwag KH, Rigon G, Cereda D, Pecoraro V, et al. E-learning for  
1031 health professionals. *Cochrane Database Syst Rev.* 2018 Jan 21;1(1):CD011736.
- 1032 151. Sharma RS, Rohatgi A, Jain S, Singh D. The Ayushman Bharat Digital Mission  
1033 (ABDM): making of India's Digital Health Story. *CSI Trans ICT.* 2023 Apr;11(1):3–9.

Identification

Records identified from PubMed:  
Databases (n = 9884)

Records removed *before screening*:  
Duplicate records removed (n = 203)  
Records marked as ineligible by automation tools (n = 0)  
Records removed for other reasons (n = 0)

Screening

Records screened (n = 9681)

Records excluded: n= 6714  
Inappropriate study design (n =439)  
Study setting outside India (n = 1900)  
Not on HRH cadre (n = 2647)  
Not about HR practice (n = 325)  
Not about Telehealth (n =1403)

Reports sought for retrieval (n = 2967)

Reports not retrieved  
Full text unavailable (n = 23)

Reports assessed for eligibility (n = 2944)

Reports excluded:2838  
Not in English (n = 2)  
Inappropriate study design (n = 707)  
Study setting outside India (n = 254)  
Not on HRH cadre (n = 917)  
Not about HR practice (n = 958)

Included

Studies included in review (n = 106)



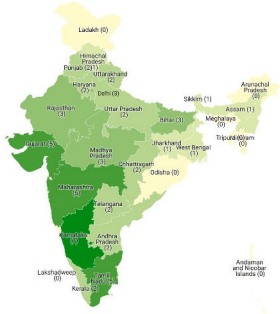

## Human Resource Related

- Prior training to use mhealth (13,20,23,25,26,32,37,41,42,44,46,49,50,52,55,57,60,62,63)
- Additional technical support (25,32,39,40,46)
- HCP with better relationship with the community (30,51)
- Incentives for mhealth use (64,69)
- Opportunity to HCW to get involved in patient care (21)

## Application-related

- Ease of using and adaptability of the intervention (20,21,23,25,29,37,38,41,42,48,52,67)
- Interactive app with videos and images (21,23,34,39–41,44–46,49,60,67–69)
- Use of local language (23,25,41,44,50,54,55,57,60)
- Cost effectiveness of the intervention (31,37,38,55,56)
- Offline content in the app (32,35,45)
- An intervention that does not increase burden (24,39,40)

## Technical

- Device availability (22,23,48,49,58,61)
- Satellite connectivity (32,35,45)
- Device with longer battery life and better functionality (23,42)

## Others

- Formative research to support fit with the context and population (29,32,44,48)
- Government support for intervention (29,30)

### Human Resource-related

- Low digital literacy (13,22,26,32,38,41,44,46,65,69)
- Shortage of HCP (20,22,46,66,69)
- Lack of awareness regarding app functions (20,21,31,32,68)
- Lack of training or poor quality of training (21,22,26,66,69)
- Lack of motivation or short-lasting interest (26,67)
- Data safety and legal concerns (37,38,58)
- Fear of internet addiction (65,68)
- Difficulty in communication while using mHealth (38)
- Lack of technical support (29)
- Time constraints during high workload (20)

### Application-related

- Malfunctioning of the application (13,20–22,24,25,29,31,37,43,66,67,69)
- Difficult to understand the language used in the application (20,21,25,34)
- Difficulty in using the application (21,34,67)
- Lack of interoperability between different mHealth tools. (29,69)

### Technical

- Poor network (20–22, 24, 32, 34,38,41,44,47,53,55,67,69)
- Malfunctioning of device (20,21,23–25, 42–44,67,69)
- Lack of access to device (22,25,26,29,41, 68)
- Poor infrastructure - lack of electricity, battery backup (22,69)

### Others

- Stigma related to the technology (13,38,68,69)
- Stigma related to the disease worsening due to technology use (41,55,62)
- Lack of human touch (34)
- Lack of formative research (69)

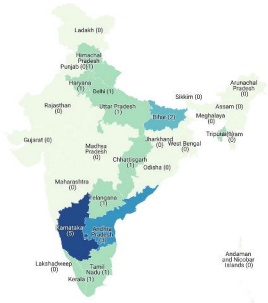

## Human Resource Related

- Prior training to use telemedicine (75,93)
- Additional technical support (76)

## Application-related

- Ease of using and adaptability of the intervention (92)
- Use of local language (89)
- Cost effectiveness of intervention (74,75,78,85,87,93,94)

## Technical

- Satellite connectivity (88)

## Human Resource-related

- Low digital literacy (72,76,94,95)
- Difficulty in communication while using telemedicine (76,83,86,87,93, 95)
- Shortage of HCP (77,78,92,93)
- Data safety and legal concerns (72,85,90,94)
- Lack of motivation or short-lasting interest (74)
- Lack of training or poor quality of training (72)
- Time constraints during high workload (73)

## Application-related

- Malfunctioning of the application (81,83,93)
- Difficult to understand the language used in the application (84,86,87,92,93)
- Difficulty in using the application (96)

## Technical

- Poor network (73,76,81,84,87, 92,94,96)
- Malfunctioning of device (76,81,92)
- Lack of access to device (84,86,95,96)
- Poor infrastructure - lack of electricity, battery backup (92–94)

## Others

- Lack of human touch (77,80,83,91,95)
- Stigma related to the technology (94)
- Unstable patients could not be managed (77,86,87)
- Difficult to track progress of patients (75,82,85,91)

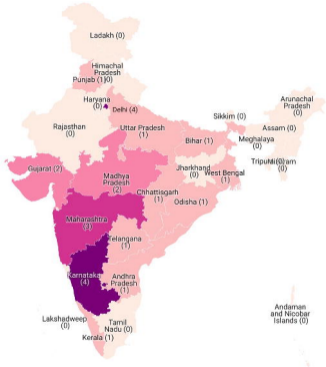

## Human Resource Related

- Prior training to use tele-education (102,118)

## Application-related

- Ease of using and adaptability of the intervention (112,122)
- Interactive app with videos and images (117)
- Use of local language (113,118)
- Cost effectiveness of intervention (101)

## Technical

- Device availability (110,118)

## Others

- Formative research to support fit with the context and population (104)



### Human Resource-related

- Low digital literacy (104,115)
- Difficulty in communication while using tele-education (123)
- Shortage of HCP (107,117)
- Lack of motivation or short-lasting interest (105,112,113)
- Lack of training or poor quality of training (99)
- Lack of technical support (117)

### Application-related

- Malfunctioning of the application (111,113)
- Difficult to understand the language used in the application (111,114)

### Technical

- Poor Network (98–100, 103, 104,109,111,113,117,120,122)
- Malfunctioning of device (114,119)
- Lack of access to device (99)
- Poor infrastructure - lack of electricity, battery backup (117)

### Others

- Stigma related to the technology (99,105)
- Stigma related to the disease worsening due to technology use (114)
- Difficult to keep track of participants (108,113,120)
