# Barriers and Facilitators for the Use of Telehealth by Healthcare Providers (HCP) in India - A Scoping Review

*Short title: Telehealth & HCP in India*

Parth Sharma<sup>1,2</sup>, Shirish Rao<sup>1,3</sup>, Padmavathy Krishna Kumar<sup>1,4</sup>, Aiswarya R Nair<sup>5</sup>, Disha Agrawal<sup>2</sup>, Siddhesh Zadey<sup>1,6,7,8</sup>, Gayathri S<sup>9</sup>, Rachna George Joseph<sup>9</sup>, Girish Dayma<sup>10</sup>, Liya Rafeekh<sup>11</sup>, Shubhashis Saha<sup>9</sup>, Sitanshi Sharma<sup>12</sup>, SS Prakash<sup>9</sup>, Venkatesan Sankarapandian<sup>9</sup>, Preethi John<sup>13</sup>, Vikram Patel<sup>14</sup>

- 1 Association for Socially Applicable Research (ASAR), Pune, Maharashtra, India
- 2 Department of Community Medicine, Maulana Azad Medical College, Delhi, India
- 3 Seth GS Medical College and KEM Hospital, Mumbai, Maharashtra, India
- 4 Adichunchanagiri Institute of Medical Sciences, BG Nagara, Karnataka, India
- 5 Travancore Medical College, Kollam, Kerala, India
- 6 Dr D. Y. Patil Medical College, Hospital, and Research Centre Pune, Dr. D. Y. Patil Vidyapeeth, Pune, Maharashtra, India
- 7 Global Emergency Medicine Innovation and Implementation (GEMINI) Research Center, Duke University School of Medicine, Durham North Carolina USA
- 8 Department of Epidemiology, Columbia University Mailman School of Public Health, New York City New York USA
- 9 Christian Medical College and Hospital, Vellore, Tamil Nadu, India
- 10 KEM Hospital Research Centre, Pune, Maharashtra, India
- 11 Indian Institute of Technology, Kharagpur, West Bengal, India
- 12 Centre for Health Research and Development, Society for applied studies, Delhi, India
- 13 Global Business School for Health, University College London UK
- 14 Harvard T.H. Chan School of Public Health, Boston MA USA

For submission to *PLOS Digital Health*

**Article Type:** Original Research  
**Abstract Word Count:** 278  
**Word Count:** 4368  
**No. of Figures:** 10  
**No. of Tables:** 3  
**Funding:** None  
**Conflicts of Interest:** None

## 39 Abstract

40 **Background:** It is widely assumed that telehealth tools like mHealth, telemedicine, and  
41 tele-education can supplement the efficiency of Healthcare Providers (HCPs). We conducted  
42 a scoping review of evidence on the barriers and facilitators associated with the use of  
43 telehealth by HCPs in India.

44  
45 **Methods:** A systematic literature search following a pre-registered protocol  
46 (<https://doi.org/10.17605/OSF.IO/KQ3U9> [PROTOCOL DOI]) was conducted in PubMed.  
47 The search strategy, inclusion, and exclusion criteria were based on the World Health  
48 Organization's action framework on Human Resources for Health (HRH) and Universal  
49 Health Coverage in India with a specific focus on telehealth tools. Eligible articles published  
50 in English from 1st January 2001 to 17th February 2022 were included.

51 **Results:** One hundred and six studies were included in the review. Of these, 53 studies  
52 (50%) involved mHealth interventions, 25 (23.6%) involved telemedicine interventions  
53 whereas the remaining 28 (26.4%) involved the use of tele-education interventions by HCPs  
54 in India. In each category, most of the studies followed a quantitative study design and were  
55 mostly published in the last 5 years. The study sites were more commonly present in states  
56 present in south India. The facilitators and barriers related to each type of intervention were  
57 analyzed under the following sub-headings- 1) Human resource related, 2) Application  
58 related 3) Technical, and 4) Others. The interventions were most commonly used for  
59 improving the management of mental health, non-communicable diseases, and maternal and  
60 child health.

61

62 **Conclusions:** Use of telehealth has not been uniformly studied in India. The facilitators  
63 and barriers to telehealth use need to be kept in mind while designing the intervention. Future  
64 studies should focus on looking at region-specific, intervention-specific, and health cadre-  
65 specific barriers and facilitators for the use of telehealth.

67 **Keywords:** Digital health, Telehealth, mHealth, Human resources for health

## 69 **Abbreviations**

70 **HCP -Health Care Provider**

71 **UHC - Universal Health Coverage**

72 **HRH - Human Resources for Health**

## 73 Introduction

74

75 Telehealth is defined “as the delivery and facilitation of health and health-related services  
76 including medical care, provider and patient education, health information services, and self-  
77 care via telecommunications and digital communication technologies.”(1) Even though used  
78 interchangeably, telehealth and telemedicine are not the same. Telehealth covers a wide range  
79 of services like telemedicine, mHealth, and remote patient monitoring. Telemedicine refers to  
80 the delivery of diagnostic or treatment services to a patient using telecommunication  
81 technology remotely. (1) mHealth on the other hand refers to applications or programs used  
82 on smartphones or tablets. (1) These interventions could be used to address the shortage of  
83 human resources for health (HRH), for education and training of HCPs, or for supporting the  
84 functioning of the existing health workforce.

85

86 Access to healthcare of adequate quality is inequitable in India which disproportionately  
87 affects(2) rural and low-resourced states, where a majority of the Indian population resides.  
88 (3) Access is worse for those belonging to vulnerable groups like the elderly, and people with  
89 disability. (4) A major driver for this inequitable access is the inequitable distribution of  
90 human resources for health (HRH). (5) These barriers have resulted in the rapid privatization  
91 of healthcare in India,(6) thus making healthcare a leading cause of out-of-pocket  
92 expenditure. (7) It is widely assumed that inequitable access to quality care could be  
93 addressed by telehealth interventions like mHealth and telemedicine and also help in cutting  
94 the costs of healthcare. (8–10)

95

96 To enhance the uptake of digital health interventions, the World Health Organization (WHO)  
97 published its Global Strategy on Digital Health for 2020-2025. (11) In India, the National

98 Health Policy (NHP) 2017 recommended the use of Information and Communications  
99 Technologies (ICT) to improve access to health services. In recent years, there has been a  
100 mushrooming of a range of telehealth interventions in India, for example, mSakhi and ASHA  
101 Kirana(12,13) in antenatal and postnatal maternal care through patient monitoring and  
102 behavior change communication; for the care of people with non-communicable diseases(14);  
103 the eSanjeevani telemedicine portal to improve access to care in remote areas(15), and to  
104 train HRH. (16)

105

106 In the context of the significant place occupied by telehealth in national health policy and the  
107 multitude of telehealth interventions being piloted in different sectors and regions of the  
108 country, this review was conducted with the primary objective of understanding the  
109 facilitators, and barriers associated with the use of telehealth tools, like telemedicine, tele-  
110 education and mHealth, by HR in India. We also aimed to look at the role of telehealth in  
111 various aspects of the health system from service delivery, education, and training of HRHs,  
112 to its impact on their functioning and also their attitude toward the intervention.

113

114

## 115 **Methods**

116

## 117 **Overview**

118 This study is a scoping review conducted as one of the components of a larger evidence  
119 synthesis exercise undertaken by the Lancet Citizens' Commission on Reimagining India's  
120 Health System ([www.citizenshealth.in](http://www.citizenshealth.in)). The protocol for evidence synthesis for the entire  
121 HRH workstream was registered on 16th June 2022. (17) It is in compliance with the Arksey

and O'Malley methodological framework(18) and the PRISMA-ScR guidelines (19) and can be accessed here- <https://doi.org/10.17605/OSF.IO/KQ3U9> [PROTOCOL DOI].

## Search Strategy

The review was a part of the larger evidence synthesis work on HRH for UHC in India. The search was conducted for published literature between 1st January 2001 and 17th February 2022 in the PubMed database. The search strategy focused on the WHO action framework on HRH and diverse categories of medical professional cadres along with universal health care in India (**S1 Panel**).

## Screening and Selection

All the articles identified through the search strategy using the above-mentioned database were added to the Distiller SR software and duplicates were removed. A multi-level screening of articles using DistillerSR software was carried out by the team as described in the PRISMA-ScR 2020 diagram (**Fig 1**). Inclusion criteria included studies conducted in India and reported in English that focused on the use of telehealth by healthcare providers. Studies only evaluating clinical outcomes but not related to HRH cadre or management strategies or practices and study protocols, editorials, viewpoints, commentaries, letters, and correspondences were excluded.

### **Fig 1: PRISMA flowchart showing selection and inclusion of the studies in the review.**

The articles were divided into a team of two reviewers. At Level 1, the articles were screened only based on the title and abstract. The articles included by any one reviewer at Level 1 screening were moved to Level 2. The full text of all the articles in Level 2 was reviewed

independently by two reviewers. After the full-text screening, articles were finally excluded or included only if both reviewers were in agreement. Conflicts about the eligibility criteria were resolved either through consensus between the two reviewers or by consulting one more reviewer.

## **Data extraction and analysis**

At Level 3, data charting for all the included full-text articles was done. Charting done by one author was verified by the other author. The data extracted included the following variables: Authors, Year of Publication, Study Design, Study Setting, Study Location, HR cadre, HR practice, Sample Size, Primary Objectives, Primary Outcomes, Impact, Challenges and barriers, and Study limitations. Articles were then classified based on the type of telehealth intervention into mHealth, telemedicine, and tele-education. A descriptive analysis of the included articles was conducted to understand barriers and facilitators of telehealth use.

## **Results**

One hundred and six studies were included in the review. Of these, 53 studies (50%) involved mHealth interventions (13,20–71), 25 (23.6%) involved telemedicine interventions (72–96) whereas the remaining 28 (26.4%) involved the use of tele-education interventions by HCPs in India. (97–124)

### **mHealth**

Of the total 53 studies, nearly half the studies (45%) were quantitative(21,26–28,31,33–36,38,39,42,43,45,50,51,53,55,58,59,63,64,66,70), 14 (26%) were qualitative

(13,20,22,29,32,37,44,46–48,60,65,67,69), 12 (23%) were mixed-methods (23–25,30,40,41,52,54,56,57,62,68) and 3 (6%) were review studies.(49,61,71) No study on the use of mHealth was published before 2013 and 64% (13,20–51,55) of the studies were published after 2018 with the maximum (n=12, 23%)(13,22,24–31,33,34) number of studies being published in 2021. The studies were conducted in tertiary care or teaching hospital settings (n=28)(22,23,26–29,31–38,46,47,49,55–59,61,63,65,68,69,71), community health centers (n=6)(20,21,42,44,60,66), primary health centers (n=16)(13,30,40,43,48,50–53)(39,54,62,64,66,67,70), and other settings (n=4). (24,25,41,45) The use of mHealth was most studied in Karnataka (n=7)(13,28,41,52,66,67,71), followed by Gujarat (21,38,44,58,65), Maharashtra (26,28,32,49,66), and Tamil Nadu (26,36,37,51,53) (5 studies each) (**Fig 2**). Findings from all included studies have been summarized in the S1 Table.

## **Fig 2: The number of study sites per state in India for mHealth**

mHealth interventions were most commonly used by doctors (n=38)(21–23,25–27,30,31,35–38,40–45,47–50,52–54,56–62,64,65,68–71), followed by community healthcare workers (n=18)(22,28–30,32–34,36,39,41,44,46,49,51,58,63,66,67), nurses (n=8)(13,20,22,41,42,55,56,68), allied health professionals (n=4)(43,54,68,70), auxiliary midwife nurses (n=3)(22,36,41), and others (n=8). (24,29,36,46,54,62,64,68)

## **1. Facilitators and barriers to the use of mHealth**

Prior training to use the mHealth intervention (n=19)(13,20,23,25,26,32,37,41,42,44,46,49,50,52,55,57,60,62,63), interactive intervention with the use of videos and images (n=14)(21,23,34,39–41,44–46,49,60,67–69), and



availability of the device to use the intervention (n=6)(22,23,48,49,58,61) were the most common human resource-related, application-related, and technical facilitators respectively. Formative research prior to designing the intervention (n=4)(29,32,44,48) and government support for the intervention (n=2)(29,30) were other facilitators that were identified. Other facilitators are mentioned in **Fig 3**.

### **Fig 3: Facilitators of use of mHealth**

Low digital literacy (n=10)(13,22,26,32,38,41,44,46,65,69), malfunctioning of the software (n=13)(13,20–22,24,25,29,31,37,43,66,67,69), and poor network connectivity (n=14)(20–22,24,32,34,38,41,44,47,53,55,67,69) were the most common human resource-related, application-related, and technical barriers respectively. Stigma related to technology (n=4)(13,38,68,69), worsening of disease-related stigma due to the use of technology (n=3)(41,55,62), lack of formative research (n=1)(69), and lack of human touch due to the use of mhealth (n=1)(34) were other barriers that were identified. Other barriers are mentioned in **Fig 4**.

### **Fig 4: Barriers to the use of mHealth**

## **2. Role of mHealth**

The mHealth interventions were most commonly used for improving maternal and child healthcare (n=24)(13,20,22–25,27,33,34,36,39–43,53,54,59,60,63,64,66–68), followed by non-communicable diseases like diabetes, hypertension, and cancer (n=12)(26,28,30,31,46,47,50–52,55,57,65) and mental health (n=6).(21,32,44,49,61,62)

Based on the WHO action framework on HRH, 29 (55%) studies focused on Human Resource (HR) management and aimed at improving the efficiency of available human resources.(13,22–24,28–30,33,35–40,42,43,46,51,54,55,57,58,61,64–67,69,71) Twenty-three (43%) studies involved mHealth interventions that aimed at the education and training of HCPs.(20,21,25–27,31,32,34,41,44,45,47–50,52,53,59,60,62,63,68,70) Only one study looked at the financial aspect of the intervention’s use by the HCPs.(56)

### 3. Impact of mHealth Interventions and Attitude of HCPs towards Them

The use of mHealth impacted the practice of HCPs in various ways. Improvement in patient outcome was reported in 22 studies (20,24,28,33,36,39–43,46,47,49,51,53,54,60–63,69,71), improvement in knowledge of HCP in 18 studies (13,20,21,23,27,29,36,41,44,45,53,55,59,62,65,68–70), and improvement in work performance of HCP in 24 studies (13,20,22,23–25,29,33,38,40,41–43,45,46,48,52–54,59,65,67,69,71). Studies also reported an improvement in confidence (n=7)(13,20,23,42,46,52,68) and communication (n=7)(13,40,41,43,50,54,58) while using mHealth interventions. The other impacts are mentioned in **Table 2**.

**Table 2: Impact of telehealth interventions**

|                                 | <b>mHealth</b>                                    | <b>Telemedicine</b>             | <b>Tele-education</b>           |
|---------------------------------|---------------------------------------------------|---------------------------------|---------------------------------|
| <b>Variable</b>                 | <b>Number of studies (n=53)</b>                   | <b>Number of studies (n=25)</b> | <b>Number of studies (n=28)</b> |
| Improvement in work performance | 24 (13,20,22,23–25,29,33,38,40,41–43,45,46,48,52– | 3 (76,85,92)                    | 5 (97,101,105,114,124)          |

|                                                                                    |                                                         |                                    |                                                             |
|------------------------------------------------------------------------------------|---------------------------------------------------------|------------------------------------|-------------------------------------------------------------|
|                                                                                    | 54,59,65,67,69,71)                                      |                                    |                                                             |
| Improvement in patient outcome                                                     | 22 (20,24,28,33,36,39–43,46,47,49,51,53,54,60–63,69,71) | 16 (74–78,81,82,85–87,89,91–94,96) | 2 (102,110)                                                 |
| Improvement in knowledge of HCP                                                    | 18 (13,20,21,23,27,29,36,41,44,45,53,55,59,62,65,68–70) | 3 (76,85,89)                       | 17 (97,100,101,104,105,107,108,110,111,114–118,120,122,124) |
| Increases social status/ recognition of work/care seeking/trust/reliability of HCP | 11 (13,22,23,25,36,39–41,43,52,69)                      | 2 (76,82)                          | -                                                           |
| Promotes better communication and relationship between HCP-HCP/HCP - patient       | 7 (13,40,41,43,50,54,58)                                | 2 (76,95)                          | 1 (119)                                                     |
| Increase in confidence                                                             | 7 (13,20,23,42,46,52,68)                                | 1 (76)                             | 5 (104,107,110,111,115)                                     |
| Flexibility to learn offered by the intervention                                   | 7 (21,23,29,31,44,65,70)                                | 1 (83)                             | 4 (116,118,122,123)                                         |
| Saves time                                                                         | 6 (20,41,44,48,52,71)                                   | 3 (87,92,94)                       | -                                                           |
| No diagnostic difference as compared to conventional techniques                    | 3 (47,57,61)                                            | 3 (79,88,92)                       | 1 (124)                                                     |
| Decrease in workload/stress                                                        | 3 (20,39,46)                                            | 2 (76,94)                          | -                                                           |
| Decreases travel                                                                   | 2 (44,56)                                               | 4 (78,91,92,94)                    | 1 (101)                                                     |
| Increased motivation of HCP due to the intervention                                | 2(52,69)                                                | 1(77)                              | 1(122)                                                      |

242

243 Out of the 53 studies, 26 studies reported positive attitudes of HCPs toward mHealth  
244 interventions (13,22,25,26,29,31,32,34–38,40–46,49,52,53,55,58,68,69) whereas 1 study

reported a negative attitude (65) and the remaining did not mention the attitude of the HCP toward the intervention. Nine studies reported that the HCP was satisfied with the intervention (24,29,31,32,43,54,55,61,68) and in two studies HCP mentioned that they would recommend the intervention to others. (23,31)

#### 4. Limitations of studies assessing the use of mHealth

Studies evaluating the use of mHealth interventions commonly cited inadequate sample size (n=10)(21,29,32,38–40,44,62,64,69), poor sampling techniques (n=9)(26,36,38–40,44,62,64,69), and incomplete data (n=7)(33,39,40,42,47,50,63) as limitations. Desirability bias, as mentioned in 8 studies (20,21,23,25,32,36,39,64), could have resulted in a more positive outcome of the interventions being studied. Other limitations of studies are mentioned in **Table 3**.

**Table 3: Limitations of studies included in the review**

|                                                | mHealth                         | Telemedicine             | Tele-education           |
|------------------------------------------------|---------------------------------|--------------------------|--------------------------|
| Variable                                       | Number of studies (n=53)        | Number of studies (n=25) | Number of studies (n=28) |
| Inadequate sample size                         | 10 (21,29,32,38–40,44,62,64,69) | 4 (74,81,85,86)          | 4 (107,110,111,114)      |
| Poor sampling technique                        | 9 (26,36,38–40,44,62,64,69)     | 2 (72,73)                | 3 (114,121,123)          |
| Incomplete data/other data related constraints | 7 (33,39,40,42,47,50,63)        | 2 (74,87)                | 2 (106,108)              |
| Poor study design                              | 6 (28,49,51,56,63,65)           | 4 (80–82,96)             | 2 (109,123)              |
| Assessed perception only and not hard outcomes | 6 (20,26,31,36,42,62)           | -                        | -                        |

|                                 |                              |        |                 |
|---------------------------------|------------------------------|--------|-----------------|
| Short-term effect only assessed | 2 (31,68)                    | -      | 3 (106,107,116) |
| Short duration of study         | 3 (30,36,43)                 | -      | 1 (115)         |
| Resource constraints            | 2 (23,35)                    | -      | -               |
| Desirability bias               | 8 (20,21,23,25,32,36,39,64)/ | 1 (83) | -               |
| Recall bias                     | 2 (43,56)                    | 1 (73) | -               |
| Hawthorne bias                  | 1 (33)                       | 0      | -               |
| Inappropriate study setting     | 1 (44)                       | -      | -               |

## Telemedicine

Twenty-one studies (84%) were quantitative (72–77,79–82,84–89,91,93–96), 2 (8%) were qualitative (78,83), 1 (4%) followed mixed methodology (90) and 1 (4%) was a review study.(92) No study on the use of telemedicine by human resources for health (HRH) was published before 2011. A majority (64%)(74–78,82,84–87,89,91–93,95,96) of the studies were published after 2017 with the maximum (n=5, 20%)(75,77,84,86,91) number of studies being published in 2020. Nearly all the studies were conducted in tertiary care settings or teaching hospital settings (92%)(72,73,75–88,90–96), and only 1 study each was conducted in primary health centers (81), community health centers (73), HIV clinics (74), and non-governmental organization clinics. (89) The use of telemedicine interventions was most studied in Karnataka (n=5)(72,75,77,94,96) followed by Andhra Pradesh (n=3)(73,76,93) and Bihar (n=2).(86,87) (**Fig 5**) Findings from all included studies have been summarized in the S2 Table.

### Fig 5: The number of study sites per state in India for telemedicine

Telehealth was most commonly used by doctors (n=19)(72–77,79,80,82,83,85–88,90,91,93,94,96) and focussed more on nurses (n=5)(82,84,86,89,96) than community healthcare workers (n=3)(72,77,95), allied health professionals (n=2)(72,89), and auxiliary midwife nurses (n=2). (72,81)

## 1. Facilitators and barriers to the use of telemedicine

Prior training to use the telemedicine intervention (n=2)(75,93), use of local language(n=1)(89), and additional technical support (n=1)(76) were identified to be the human resource-related facilitators. The availability of satellite connectivity (n=1)(88) was a technical facilitator that improved the uptake of telemedicine. Cost-effectiveness (n=7)(74,75,78,85,87,93,94), and ease of use of the intervention (n=1)(92) were the application-related facilitators. (Fig 6)

### Fig 6: Facilitators of use of telemedicine

Poor network connectivity (n=8)(73,76,81,84,87,92,94,96), difficulty in understanding English, the language used in the application (n=5)(84,86,87,92,93), and difficulty in communicating while using telemedicine (n=6)(76,83,86,87,93,95) were the most common technical, application-related, and human resource-related barriers respectively. Lack of human touch (n=5)(77,80,83,91,95) and stigma related to technology (n=1)(94) also acted as barriers to the uptake of telemedicine. Other barriers are mentioned in Fig 7.

### Fig 7: Barriers to the use of telemedicine

## 2. Role of telemedicine

Telemedicine was most commonly used for providing treatment for conditions related to maternal and child health (n=5)(76,80,82,84,86), non-communicable diseases (n=3)(88,91,94) like diabetes, hypertension, and cancer, and mental health (n=3).(77,78,95) While most studies focused on improving the efficiency and performance of the HRH (n=23)(73–89,91–96), 1 study focused on the knowledge and awareness regarding telemedicine in the HCPs(72) and 1 study addressed the policy and financial aspects of telemedicine.(90)

## 3. Impact of telemedicine interventions and attitude of HCP towards them

Improvement in patient outcome (n=16)(74–78,81,82,85–87,89,91–94,96), improvement in knowledge of HCP (n=3)(76,85,89), and improvement in work performance (n=3)(76,85,92) were associated with the use of telemedicine. It also helped in reducing travel (n=4)(78,91,92,94) and when used for remote diagnosis, telemedicine showed no significant diagnostic difference when compared with conventional diagnostic modalities (n=3)(79,88,92). The other impacts are mentioned in **Table 2**.

Out of the 25 studies, 13 studies reported positive attitudes of HCPs toward telemedicine interventions (76–78,83,85–87,91–96) whereas 1 study reported a negative attitude (90) and the remaining did not mention the attitude of the HCP toward the intervention. Twelve studies reported that the HCP was satisfied with the intervention (76,77,82–84,86,87,91–94,96) and in 2 studies HCPs mentioned that they would recommend the intervention to others. (86,87)

#### 4. Limitations of studies assessing the use of telemedicine

Inadequate sample size (n=4)(74,81,85,86), poor study design (n=4)(80–82,96), and poor sampling techniques (n=2)(72,73) were the most commonly cited limitations in the studies included. Other limitations of studies are mentioned in **Table 3**.

#### Tele-education

Twenty-four studies (85.7%) were quantitative (97–102,105–109,111,112,115–124), 2 (7.1%) were qualitative (104,113), 1 (3.6%) followed mixed methodology (114) and 1 (3.6%) was a review study.(103) No study on the use of tele-education was published before 2009. A majority (72%)(97,98,100–102,104–109,111–113,116–118,121–123) of the studies were published after 2017 with the maximum (n=10, 36%)(97,98,101,106,108,109,117,121–123) number of studies being published in 2021. Nearly all the studies were conducted in tertiary care settings or teaching institutes (86%)(98–100,102–107,109–117,119–124), and only 3 studies were conducted in primary health centers (101,108,118) and 2 in community health centers. (101,108) The use of tele-education was most studied in Karnataka (n=4)(100,104,111,112) and Delhi (n=4). (102,111,117,120) (**Fig 8**) Findings from all included studies have been summarized in the S3 Table.

#### Fig 8: The number of study sites per state in India for tele-education

Tele-education services were most commonly meant for doctors (n=16)(97–103,106,109–111,117–119,121,124) followed by nurses (n=9)(98,105,106,109,111,117,121,122,124),



community healthcare workers (n=8)(103–105,107,114–116,123), allied health professionals (n=5)(98,109,114,121,124), and auxiliary midwife nurses (n=4).(108,111,112,121)

## 1. Facilitators and barriers to the use of tele-education

Similar to telemedicine, prior training to use the tele-education intervention (n=2)(102,118) and ease of using the intervention (n=2)(112,122) were the most common human resource-related, and application-related facilitators respectively. Availability of a device (n=2)(110,118) was identified to be a technical facilitator. Formative research prior to designing the intervention (n=1)(104) also helped in increasing its uptake as the formative research helped in addressing the needs of the participants. (Fig 9)

### Fig 9: Facilitators of use of tele-education

Similar to telemedicine, low digital literacy (n=2)(104,115), and poor network connectivity (n=11)(98–100,103,104,109,111,113,117,120,122) were the most common human resource-related, and technical barriers respectively. Difficulty in understanding English (n=2)(111,114), the language commonly used for the applications, and malfunctioning of the software (n=2)(111,113) were application-related barriers. Other barriers are mentioned in

### Fig 10.

### Fig 10: Barriers to the use of tele-education

## 2. Role of tele-education interventions

Tele-education services were most commonly used for educating about mental health disorders (n=9)(97,98,101,102,104,107,109,111,121) followed by non-communicable diseases like diabetes, hypertension, and cancer (n=4)(100,113,116,118) and maternal and child healthcare (n=4).(104,114,115,120) Two studies each focused on educating about oral health problems (105,106) and HIV (110,114) and one study addressed teleteaching for orthopedics (112), critical care (108), COVID-19 (117), palliative care (122) and cardiology.(124) Four studies did not mention what tele-education was used for.(99,103,119,123)

### **3. Impact of tele-education Interventions and Attitude of HCP towards Them**

Tele-education resulted in an improvement in knowledge of HCP (n=17)(97,100,101,104,105,107,108,110,111,114–118,120,122,124) and an improvement in the work performance of HCP (n=5).(97,101,105,114,124) Its use also resulted in improvement in the confidence (n=5)(104,107,110,111,115) and communication (n=1)(119) of HCPs. The other impacts are mentioned in **Table 2**.

Out of the 28 studies, 15 studies reported positive attitudes of HCPs toward tele-education interventions (97,100,104,105,108–112,114–116,122–124) whereas 1 study reported a negative attitude (99) and the remaining did not mention the attitude of the HCP toward the intervention. Nine studies reported that the HCP was satisfied with the intervention (97,107,110,111,114,115,119,120,124) and in 3 studies HCP mentioned that they would recommend the intervention to others.(110,115,122)

#### 4. Limitations of studies assessing the use of tele-education

Limitations of studies included were similar to the limitations cited by studies that assessed telemedicine with inadequate sample size (n=4)(107,110,111,114), poor study design (n=2)(109,123), and poor sampling techniques (n=3)(114,121,123) being the most commonly cited limitations. Other limitations of studies are mentioned in **Table 3**.

## Discussion

Following the rapid digitalization of healthcare, mostly following the COVID-19 pandemic, this scoping review looks at the facilitators and barriers to the application of telehealth for various health issues in the Indian health system. Even though a wide variety of interventions in the form of mHealth, telemedicine, and tele-education have been explored, only 8 states/union territories were the sites for most of the interventions. The use of telehealth by doctors, nurses, and community health workers was commonly addressed and literature on the use of the same by allied health professionals and non-medical healthcare workers was limited. Telehealth was most commonly used for HRH management aiming to improve the efficiency of available human resources. Maternal and child health, non-communicable diseases like diabetes, hypertension, obstructive airway disease, and cancer, and mental health were common areas of focus for the use of telehealth. Few studies looked at the use of telehealth for the provision of acute medical care, follow-up of patients after discharge, provision, and monitoring of home-based palliative care, and improvement in treatment compliance of patients with HIV and tuberculosis. Studies conducted globally, have also

assessed the utility of telemedicine, mHealth, and tele-education for similar diseases and conditions as done by the studies in India. (125–127)

This review brings to light multiple facilitators and barriers to telehealth adoption and use. The findings could help in the modification of national policies and guidelines which currently are not very robust. (128) Moreover the facilitators and barriers identified for mHealth, telemedicine, and tele-education are similar. An understanding of the facilitators and barriers emphasizes the need for understanding the same at multiple dimensions especially focusing on the facilitators and barriers related to Human resources for health (HRH), Infrastructure, and Technology. The facilitators and barriers identified in our review are similar to those reported previously in the context of telehealth in LMICs. Technical and infrastructural barriers in the form of internet access, device access, connectivity issues, poor battery life, and unstable electricity supply contribute to a major road back in implementing telehealth services in LMICs.(129–131) This is especially important in the context of India, where over 70% of the population resides in rural areas which are highly vulnerable to the aforementioned barriers. (132) An increase in network coverage should also be associated with a push for gender equality as it is seen that women have lesser access to mobile phones and other technologies. (133) In terms of HRH barriers, previous studies have identified HRH shortage, insufficient training, and skills, additional workload, lack of motivation lack of technical support, lack of integration with other government systems, and data safety and legal concerns.(129–131,134,135) Additionally our study provides deeper insights into barriers faced by the provider like fear of internet addiction, language barriers, and malfunction of applications. Barriers concerning the lack of human touch and stigma related to subpar patient care have also been previously raised by a systematic review conducted by Kruse C. S. et al.(136) Previous studies have also reported financial barriers in the form of

sponsorships and funding, capital expenses for technology start-up and maintenance, and budget constraints. (129,131)

In the Indian context, Government support and funding for telehealth interventions have been found to be an important facilitator for their implementations as reported by 3 studies included in our review. However, funding towards health overall is still largely limited in India as only 2.1% of the Gross Domestic Product (GDP) is invested in the public healthcare sectors. (137) Initiatives like the ‘G-20 Digital Innovation Alliance’ show promise in encouraging digital health startups by providing grants, sponsorship, and collaboration opportunities in order to strengthen the telehealth scenario. (138) Previous studies have also shown that a strong commitment from the governments towards supporting and financing telehealth has been one the major facilitators. (135) HRH & Application related facilitators in the form of prior training, technical support, use of local language, and better user interface which have been shown to be important facilitators (135), were also reported in over one-third of the studies from our review. Additionally, providing incentives for telehealth use, use of offline material, balanced overload, and the relationship of CHW with the community were also found to be other important facilitators in our review. Formative research to support fit with the context and population was seen as an important facilitator for telehealth in India; this emphasizes the need for regional research as well as customizing the intervention as per the setting. Fifteen studies also emphasized the cost-effectiveness of telehealth interventions, which serve as a vital facilitator in resource-constrained settings like India.

Our review reported a strong impact of telehealth on patient care in terms of better patient outcomes, treatment compliance, and disease knowledge. It reduced travel constraints and

improved accessibility for both patients and healthcare providers which has also been shown to improve the previously mentioned outcomes. (139,140) Specifically for healthcare workers, a greater number of studies showed that the use of telehealth improved their performance, confidence, and patient communication. Globally as well, multiple studies have reported similar positives. (141,142) However, a few studies also highlight contradicting findings which are multifactorial and scenario-dependent. (143,144) Studies assessing the use of telehealth diagnostics have also shown promising results in India which are similar to other studies conducted globally. (127,145–147) Our review also highlights the utility of digital health interventions in the overall education and skill training of HRH personnel. As shown by multiple studies conducted during the COVID-19 pandemic, remote learning facilitated by tele-education has proven to be an effective tool that can be harnessed even after the pandemic in order to make education and training more convenient and accessible. (145,148–150)

The need for decentralized healthcare planning was identified following the Covid-19 pandemic. (7) Our review identifies that with respect to telehealth, the generation of scientific literature on facilitators and barriers has been concentrated in a few states only. As the government is pushing for the digitization of healthcare through the Ayushman Bharat Digital Health Mission (151), it is important to understand the barriers and facilitators not just at the national level but also at the community level. More comparable evidence needs to be generated in order to understand local factors affecting the implementation of telehealth in India.

## **Strengths and Limitations**

A few of the strengths of our studies are the use of a robust search strategy and the inclusion of a large number of studies. While previous reviews have assessed the overall utility of telemedicine, our review specifically looks at telehealth, which covers broader interventions, and its utility in the context of HRH providers. In the Indian context use of mHealth, telemedicine, and tele-education by community health workers has been an important highlight of our review. However, the findings of this review must be interpreted in the context of the following limitations. Firstly, studies included mainly assess the utility of public health, mHealth, telemedicine, and tele-education portals, while there are multiple private applications that are usually accessible to upper socioeconomic strata, whose utility hasn't been assessed. Secondly, since this is a scoping review we only provide a brief overview of the facilitators and barriers, and an in-depth analysis of study outcomes, meta-analysis, and critical appraisal of the risk of bias was not performed for the studies included. Thirdly, while analyzing the number of studies from each state, data was not available for 28 studies, and 8 studies were conducted in multiple states with no mention of the names of the states involved. Finally, our search strategy, though comprehensive, is limited only to PubMed, which might have led to the exclusion of a few studies available on other databases like Scopus and EMBASE.

## Conclusion

Use of telehealth has not been studied uniformly across India. Systematic efforts need to be taken to anticipate and address barriers and implement telehealth intervention in ways to facilitate its uptake. Future studies should focus on looking at region-specific, intervention-specific, and health cadre-specific barriers and facilitators for the use of telehealth in order to

promote decentralized decision-making for successfully implementing telehealth interventions in India.

## Acknowledgments

We want to thank Dr. Dipanwita Sengupta, Lancet Citizens' Commission Member for her support during the review process. We also want to thank Ms. Vashumathi Sriganesh from QMed Knowledge Foundation, Mumbai for providing her support for building the search strategy.

## Supporting Information

S1 Panel: PubMed search strategy

S2 Panel: HR Cadres

S1 Table: Study characteristics for studies on mHealth as mentioned by the authors.

S2 Table: Study characteristics for studies on telemedicine as mentioned by the authors.

S3 Table: Study characteristics for studies on tele-education as mentioned by the authors.

S4 Table: HRH Framework

## References

1. Catalyst N. What Is Telehealth? NEJM Catal [Internet]. 2018 Feb 1 [cited 2023 Sep 28]; Available from: <https://catalyst.nejm.org/doi/full/10.1056/CAT.18.0268>
2. Balarajan Y, Selvaraj S, Subramanian SV. Health care and equity in India. Lancet. 2011 Feb 5;377(9764):505–15.



- 546 3. Barik D, Thorat A. Issues of Unequal Access to Public Health in India. *Front Public*  
547 *Health*. 2015;3:245.
- 548 4. South India Disability Evidence Study Group, Gudlavalleti MVS, John N, Allagh K, Sagar  
549 J, Kamalakannan S, et al. Access to health care and employment status of people with  
550 disabilities in South India, the SIDE (South India Disability Evidence) study. *BMC*  
551 *Public Health*. 2014 Dec;14(1):1125.
- 552 5. Karan A, Negandhi H, Hussain S, Zapata T, Mairembam D, De Graeve H, et al. Size,  
553 composition and distribution of health workforce in India: why, and where to invest?  
554 *Hum Resour Health*. 2021 Dec;19(1):1–14.
- 555 6. Sengupta A, Nundy S. The private health sector in India. *BMJ*. 2005 Nov  
556 19;331(7526):1157–8.
- 557 7. Pramesh CS, Seshadri DVR, Fernandez E, Rao GN, Dutta M, Mohan P, et al. Healthcare  
558 in post-COVID India: A call for a decentralized healthcare system. *J Fam Med Prim*  
559 *Care*. 2021 Dec;10(12):4337–40.
- 560 8. Sorwar G, Rahamn MM, Uddin R, Hoque MR. Cost and Time Effectiveness Analysis of a  
561 Telemedicine Service in Bangladesh. *Stud Health Technol Inform*. 2016;231:127–34.
- 562 9. Snoswell CL, Taylor ML, Comans TA, Smith AC, Gray LC, Caffery LJ. Determining if  
563 Telehealth Can Reduce Health System Costs: Scoping Review. *J Med Internet Res*.  
564 2020 Oct 19;22(10):e17298.
- 565 10. Cabrera CI, Ning AY, Cai Y, D’Anza B. Systematic Review of Telehealth Cost  
566 Minimization for Patients and Health Systems in Otolaryngology. *The Laryngoscope*.  
567 2021 Aug;131(8):1741–8.

- 568 11. Global strategy on digital health 2020-2025. Geneva: World Health Organization; 2021.  
569 Licence: CC BY-NC-SA 3.0 IGO. Available from: [https://www.who.int/docs/default-](https://www.who.int/docs/default-source/documents/gd4dhaa2a9f352b0445bafbc79ca799dce4d.pdf)  
570 [source/documents/gd4dhaa2a9f352b0445bafbc79ca799dce4d.pdf](https://www.who.int/docs/default-source/documents/gd4dhaa2a9f352b0445bafbc79ca799dce4d.pdf)
- 571 12. Patel AB, Kuhite PN, Alam A, Pusdekar Y, Puranik A, Khan SS, et al. M-SAKHI-  
572 Mobile health solutions to help community providers promote maternal and infant  
573 nutrition and health using a community-based cluster randomized controlled trial in  
574 rural India: A study protocol. *Matern Child Nutr*. 2019 Oct;15(4):e12850.
- 575 13. Srinidhi V, Karachiwala B, Iyer A, Reddy B, Mathrani V, Madhiwalla N, et al. ASHA  
576 Kirana: when digital technology empowered front-line health workers. *BMJ Glob*  
577 *Health*. 2021 Sep;6(Suppl 5):e005039.
- 578 14. Hossain MM, Tasnim S, Sharma R, Sultana A, Shaik AF, Faizah F, et al. Digital  
579 interventions for people living with non-communicable diseases in India: A systematic  
580 review of intervention studies and recommendations for future research and  
581 development. *Digit Health*. 2019 Jan;5:205520761989615.
- 582 15. Markan A, Kishore A, Agarwal A, Akella M, Singh A, Goyal S, et al. Demographic  
583 profile of patients seeking teleophthalmology consultations through e-Sanjeevani:  
584 Retrospective analysis of 5138 patients from North India. *Indian J Ophthalmol*. 2022  
585 Dec;70(12):4238–43.
- 586 16. Panda R, Mishra N, Lahoti S, Prabhu RR, Mishra A, Singh K, et al. Evaluation of  
587 COVID-19 ECHO training program for healthcare workers in India - A Mixed-Method  
588 Study. *BMC Health Serv Res*. 2022 Jul 8;22(1):883.

- 589 17. OSF Registries | A comprehensive scoping review protocol to analyze the evidence on  
590 human resources for health management strategies in India [Internet]. [cited 2023 Sep  
591 28]. Available from: <https://osf.io/kq3u9>
- 592 18. Arksey H, O'Malley L. Scoping studies: towards a methodological framework. *Int J Soc*  
593 *Res Methodol*. 2005 Feb;8(1):19–32.
- 594 19. Tricco AC, Lillie E, Zarin W, O'Brien KK, Colquhoun H, Levac D, et al. PRISMA  
595 Extension for Scoping Reviews (PRISMA-ScR): Checklist and Explanation. *Ann Intern*  
596 *Med*. 2018 Oct 2;169(7):467–73.
- 597 20. Usmanova G, Gresh A, Cohen MA, Kim YM, Srivastava A, Joshi CS, et al.  
598 Acceptability and Barriers to Use of the ASMAN Provider-Facing Electronic Platform  
599 for Peripartum Care in Public Facilities in Madhya Pradesh and Rajasthan, India: A  
600 Qualitative Study Using the Technology Acceptance Model-3. *Int J Environ Res Public*  
601 *Health*. 2020 Nov 11;17(22).
- 602 21. Muke SS, Tugnawat D, Joshi U, Anand A, Khan A, Shrivastava R, et al. Digital  
603 Training for Non-Specialist Health Workers to Deliver a Brief Psychological Treatment  
604 for Depression in Primary Care in India: Findings from a Randomized Pilot Study. *Int J*  
605 *Environ Res Public Health*. 2020 Sep 1;17(17).
- 606 22. Scott K, Ummer O, Chamberlain S, Sharma M, Gharai D, Mishra B, et al. At the  
607 frontlines of digitisation: a qualitative study on the challenges and opportunities in  
608 maintaining accurate, complete and timely digital health records in India's government  
609 health system. *BMJ Open*. 2022 Feb;12(2):e051193.

- 610 23. Bhattacharjya S, Lenker J, Ghosh R. Assessing the usefulness of an mHealth strategy to  
611 support implementation of multi-faceted adaptive feeding interventions by community-  
612 based rehabilitation workers. *Assist Technol*. 2023 May 4;35(3):228–34.
- 613 24. Gupta A, Agrawal R, Gupt A, Guleri R, Bajpayee D, Joshi N, et al. Systems E-approach  
614 for women at risk (SEWA)—A digital health solution for detection of high-risk  
615 pregnancies. *J Fam Med Prim Care*. 2021;10(10):3712.
- 616 25. Charanthimath U, Katageri G, Kinshella MLW, Mallapur A, Goudar S, Ramadurg U, et  
617 al. Community Health Worker Evaluation of Implementing an mHealth Application to  
618 Support Maternal Health Care in Rural India. *Front Glob Womens Health*. 2021 Sep  
619 1;2:645690.
- 620 26. Bairapareddy KC, Alaparathi GK, Jitendra RS, Prathiksha, Rao PP, Shetty V, et al. “We  
621 are so close; yet too far”: perceived barriers to smartphone-based telerehabilitation  
622 among healthcare providers and patients with Chronic Obstructive Pulmonary Disease  
623 in India. *Heliyon*. 2021 Aug;7(8):e07857.
- 624 27. Bashingwa JJH, Shah N, Mohan D, Scott K, Chamberlain S, Mulder N, et al. Examining  
625 the reach and exposure of a mobile phone-based training programme for frontline health  
626 workers (ASHAs) in 13 states across India. *BMJ Glob Health*. 2021 Aug;6(Suppl  
627 5):e005299.
- 628 28. Deo S, Singh P. Community health worker-led, technology-enabled private sector  
629 intervention for diabetes and hypertension management among urban poor: a  
630 retrospective cohort study from large Indian metropolitan city. *BMJ Open*. 2021  
631 Aug;11(8):e045246.

- 632 29. Singh NS, Scott K, George A, LeFevre AE, Ved R. A tale of ‘politics and stars  
633 aligning’: analysing the sustainability of scaled up digital tools for front-line health  
634 workers in India. *BMJ Glob Health*. 2021 Jul;6(Suppl 5):e005041.
- 635 30. Schierhout G, Praveen D, Patel B, Li Q, Mogulluru K, Ameer MA, et al. Why do  
636 strategies to strengthen primary health care succeed in some places and fail in others?  
637 Exploring local variation in the effectiveness of a community health worker managed  
638 digital health intervention in rural India. *BMJ Glob Health*. 2021 Jul;6(Suppl  
639 5):e005003.
- 640 31. Subramanian S, Jose R, Lal A, Augustine P, Jones M, Gopal BK, et al. Acceptability,  
641 Utility, and Cost of a Mobile Health Cancer Screening Education Application for  
642 Training Primary Care Physicians in India. *The Oncologist*. 2021 Dec 1;26(12):e2192–  
643 9.
- 644 32. Khan A, Shrivastava R, Tugnawat D, Singh A, Dimidjian S, Patel V, et al. Design and  
645 Development of a Digital Program for Training Non-specialist Health Workers to  
646 Deliver an Evidence-Based Psychological Treatment for Depression in Primary Care in  
647 India. *J Technol Behav Sci*. 2020 Dec;5(4):402–15.
- 648 33. Usmanova G, Lalchandani K, Srivastava A, Joshi CS, Bhatt DC, Bairagi AK, et al. The  
649 role of digital clinical decision support tool in improving quality of intrapartum and  
650 postpartum care: experiences from two states of India. *BMC Pregnancy Childbirth*.  
651 2021 Dec;21(1):278.
- 652 34. Anand P, Thukral A, Deorari A, National Neonatology Forum Network, Sethi A, Kumar  
653 A, et al. Dissemination of Best Practices in Preterm Care Through a Novel Mobile

654 Phone-Based Interactive e-Learning Platform. Indian J Pediatr. 2021 Nov;88(11):1068–  
655 74.

656 35. Swathi M, Sabeena S, Abdulmajeed J, Pattanaik S, Dsa O, Shubha H, et al.  
657 Development and evaluation of a mobile app for guiding rabies prophylaxis among  
658 health-care professionals in India. Indian J Community Med. 2020;45(4):472.

659 36. Ward VC, Raheel H, Weng Y, Mehta KM, Dutt P, Mitra R, et al. Impact of mHealth  
660 interventions for reproductive, maternal, newborn and child health and nutrition at scale:  
661 BBC Media Action and the Ananya program in Bihar, India. J Glob Health. 2020  
662 Dec;10(2):021005.

663 37. Chattopadhyay T, Mondal H, Mondal S, Dutta R, Saha K, Das D. Prescription  
664 digitization, online preservation, and retrieval on a smartphone. J Fam Med Prim Care.  
665 2020;9(10):5295.

666 38. Harding R, Carrasco JM, Serrano-Pons J, Lemaire J, Namisango E, Luyirika E, et al.  
667 Design and Evaluation of a Novel Mobile Phone Application to Improve Palliative  
668 Home-Care in Resource-Limited Settings. J Pain Symptom Manage. 2021 Jul;62(1):1–  
669 9.

670 39. Modi D, Saha S, Vaghela P, Dave K, Anand A, Desai S, et al. Costing and Cost-  
671 Effectiveness of a Mobile Health Intervention (ImTeCHO) in Improving Infant  
672 Mortality in Tribal Areas of Gujarat, India: Cluster Randomized Controlled Trial. JMIR  
673 MHealth UHealth. 2020 Oct 14;8(10):e17066.

674 40. Shah P, Madhiwala N, Shah S, Desai G, Dave K, Dholakia N, et al. High uptake of an  
675 innovative mobile phone application among community health workers in rural India:  
676 An implementation study. Natl Med J India. 2019;32(5):262.

- 677 41. Suryavanshi N, Kadam A, Kanade S, Gupte N, Gupta A, Bollinger R, et al.  
678 Acceptability and feasibility of a behavioral and mobile health intervention  
679 (COMBIND) shown to increase uptake of prevention of mother to child transmission  
680 (PMTCT) care in India. BMC Public Health. 2020 Dec;20(1):752.
- 681 42. Carmichael SL, Mehta K, Srikantiah S, Mahapatra T, Chaudhuri I, Balakrishnan R, et  
682 al. Use of mobile technology by frontline health workers to promote reproductive,  
683 maternal, newborn and child health and nutrition: a cluster randomized controlled Trial  
684 in Bihar, India. J Glob Health. 2019 Dec;9(2):0204249.
- 685 43. Modi D, Dholakia N, Gopalan R, Venkatraman S, Dave K, Shah S, et al. mHealth  
686 intervention “ImTeCHO” to improve delivery of maternal, neonatal, and child care  
687 services—A cluster-randomized trial in tribal areas of Gujarat, India. Myers JE, editor.  
688 PLOS Med. 2019 Oct 24;16(10):e1002939.
- 689 44. Muke SS, Shrivastava RD, Mitchell L, Khan A, Murhar V, Tugnawat D, et al.  
690 Acceptability and feasibility of digital technology for training community health  
691 workers to deliver brief psychological treatment for depression in rural India. Asian J  
692 Psychiatry. 2019 Oct;45:99–106.
- 693 45. Khan A, Sebok-Syer SS, Linstadt H, Storm M, Modan N, Bosco MK, et al. An  
694 Electronic-Based Curriculum to Train Acute Care Providers in Rural Haiti and India. J  
695 Grad Med Educ. 2019 Aug 1;11(4s):152–7.
- 696 46. Jindal D, Roy A, Ajay VS, Yadav SK, Prabhakaran D, Tandon N. Strategies for  
697 Stakeholder Engagement and Uptake of New Intervention: Experience From State-Wide  
698 Implementation of mHealth Technology for NCD Care in Tripura, India. Glob Heart.  
699 2019 Jun 1;14(2):165.

- 700 47. Birur Np, Gurushanth K, Patrick S, Sunny S, Raghavan S, Gurudath S, et al. Role of  
701 community health worker in a mobile health program for early detection of oral cancer.  
702 Indian J Cancer. 2019;56(2):107.
- 703 48. Abdel-All M, Angell B, Jan S, Praveen D, Joshi R. The development of an Android  
704 platform to undertake a discrete choice experiment in a low resource setting. Arch  
705 Public Health. 2019 Dec;77(1):20.
- 706 49. Naslund JA, Shidhaye R, Patel V. Digital Technology for Building Capacity of  
707 Nonspecialist Health Workers for Task Sharing and Scaling Up Mental Health Care  
708 Globally. Harv Rev Psychiatry. 2019 May;27(3):181–92.
- 709 50. Peiris D, Praveen D, Mogulluru K, Ameer MA, Raghu A, Li Q, et al. SMARThealth  
710 India: A stepped-wedge, cluster randomised controlled trial of a community health  
711 worker managed mobile health intervention for people assessed at high cardiovascular  
712 disease risk in rural India. Liu G, editor. PLOS ONE. 2019 Mar 26;14(3):e0213708.
- 713 51. Dandge S, Jeemon P, Reddy PS. Technology enabled non-physician health workers  
714 extending telemedicine to rural homes to control hypertension and diabetes (TETRA): A  
715 pre-post demonstration project in Telangana, India. Deserno TM, editor. PLOS ONE.  
716 2019 Feb 19;14(2):e0211551.
- 717 52. Bhatt S, Isaac R, Finkel M, Evans J, Grant L, Paul B, et al. Mobile technology and  
718 cancer screening: Lessons from rural India. J Glob Health. 2018 Dec;8(2):020421.
- 719 53. Shah S, Shinde A, Anand A, Modi D, Desai G, Bhatt H, et al. The role of an MH ealth  
720 intervention in improving knowledge and skills of accredited social health activists in  
721 tribal areas of Gujarat, India: a nested study within an implementation research trial.  
722 Acta Paediatr. 2018 Dec;107(S471):72–9.



- 723 54. Pant Pai N, Daher J, Prashanth H, Shetty A, Sahni RD, Kannangai R, et al. Will an  
724 innovative connected AideSmart! app-based multiplex, point-of-care screening strategy  
725 for HIV and related coinfections affect timely quality antenatal screening of rural Indian  
726 women? Results from a cross-sectional study in India. *Sex Transm Infect.* 2019  
727 Mar;95(2):133–9.
- 728 55. Birur NP, Patrick S, Bajaj S, Raghavan S, Suresh A, Sunny SP, et al. A Novel Mobile  
729 Health Approach to Early Diagnosis of Oral Cancer. *J Contemp Dent Pract.* 2018 Sep  
730 1;19(9):1122–8.
- 731 56. Sharma D, Rohilla L, Bagga R, Srinivasan R, Jindal HA, Sharma N, et al. Feasibility of  
732 implementing cervical cancer screening program using smartphone imaging as a  
733 training aid for nurses in rural India. *Public Health Nurs.* 2018 Nov;35(6):526–33.
- 734 57. Ilozumba O, Dieleman M, Kraamwinkel N, Van Belle S, Chaudoury M, Broerse JEW.  
735 “I am not telling. The mobile is telling”: Factors influencing the outcomes of a  
736 community health worker mHealth intervention in India. Fernandez-Reyes D, editor.  
737 *PLOS ONE.* 2018 Mar 27;13(3):e0194927.
- 738 58. Patterson V, Samant S, Singh MB, Jain P, Agavane V, Jain Y. Diagnosis of epileptic  
739 seizures by community health workers using a mobile app: A comparison with  
740 physicians and a neurologist. *Seizure.* 2018 Feb;55:4–8.
- 741 59. Garner SL, Sudia T, Rachaprolu S. Smart phone accessibility and mHealth use in a  
742 limited resource setting. *Int J Nurs Pract.* 2018 Feb;24(1):e12609.
- 743 60. Prinja S, Nimesh R, Gupta A, Bahuguna P, Gupta M, Thakur JS. Impact of m□health  
744 application used by community health volunteers on improving utilisation of maternal,

- newborn and child health care services in a rural area of Uttar Pradesh, India. Trop  
Med Int Health. 2017 Jul;22(7):895–907.
61. Naslund JA, Aschbrenner KA, Araya R, Marsch LA, Unützer J, Patel V, et al. Digital  
technology for treating and preventing mental disorders in low-income and middle-  
income countries: a narrative review of the literature. Lancet Psychiatry. 2017  
Jun;4(6):486–500.
62. Maulik PK, Kallakuri S, Devarapalli S, Vadlamani VK, Jha V, Patel A. Increasing use  
of mental health services in remote areas using mobile technology: a pre–post  
evaluation of the SMART Mental Health project in rural India. J Glob Health. 2017  
Jun;7(1):010408.
63. Balakrishnan R, Gopichandran V, Chaturvedi S, Chatterjee R, Mahapatra T, Chaudhuri  
I. Continuum of Care Services for Maternal and Child Health using mobile technology –  
a health system strengthening strategy in low and middle income countries. BMC Med  
Inform Decis Mak. 2016 Dec;16(1):84.
64. Modi D, Patel J, Desai S, Shah P. Accessing completeness of pregnancy, delivery, and  
death registration by Accredited Social Health Activists [ASHA] in an innovative  
mHealth project in the tribal areas of Gujarat: A cross-sectional study. J Postgrad Med.  
2016;62(3):170.
65. Smith R, Menon J, Rajeev JG, Feinberg L, Kumar RK, Banerjee A. Potential for the use  
of mHealth in the management of cardiovascular disease in Kerala: a qualitative study.  
BMJ Open. 2015 Nov 17;5(11):e009367–e009367.

66. Gera R, Muthusamy N, Bahulekar A, Sharma A, Singh P, Sekhar A, et al. An in-depth assessment of India's Mother and Child Tracking System (MCTS) in Rajasthan and Uttar Pradesh. *BMC Health Serv Res*. 2015 Dec;15(1):315.
67. Modi D, Gopalan R, Shah S, Venkatraman S, Desai G, Desai S, et al. Development and formative evaluation of an innovative mHealth intervention for improving coverage of community-based maternal, newborn and child health services in rural areas of India. *Glob Health Action*. 2015 Dec;8(1):26769.
68. Thukral A, Joshi M, Joshi P, Prakash V, Adkoli BV, Deorari AK. Apps for Management of Sick Newborn: Evaluation of Impact on Health Care Professionals. *J Trop Pediatr*. 2014 Oct 1;60(5):370–6.
69. Jarosławski S, Saberwal G. In eHealth in India today, the nature of work, the challenges and the finances: an interview-based study. *BMC Med Inform Decis Mak*. 2014 Dec;14(1):1.
70. Rajasekaran R, Sriman Narayana Iyengar NC. Peer-to-Peer JXTA Architecture for Continuing Mobile Medical Education Incorporated in Rural Public Health Centers. *Osong Public Health Res Perspect*. 2013 Apr;4(2):99–106.
71. Goel S, Bhatnagar N, Sharma D, Singh A. Bridging the Human Resource Gap in Primary Health Care Delivery Systems of Developing Countries With mHealth: Narrative Literature Review. *JMIR Mhealth Uhealth*. 2013 Dec 3;1(2):e25.
72. Zayapragassarazan Z. Awareness, Knowledge, Attitude and Skills of Telemedicine among Health Professional Faculty Working in Teaching Hospitals. *J Clin Diagn Res*. 2016; Available from: [http://jcd.r.net/article\\_fulltext.asp?issn=0973-709x&year=2016&volume=10&issue=3&page=JC01&issn=0973-709x&id=7431](http://jcd.r.net/article_fulltext.asp?issn=0973-709x&year=2016&volume=10&issue=3&page=JC01&issn=0973-709x&id=7431)

73. Lindquist B, Strehlow MC, Rao GVR, Newberry JA. Barriers to Real-Time Medical Direction via Cellular Communication for Prehospital Emergency Care Providers in Gujarat, India. *Cureus*. 2016 Jul 8; Available from: <http://www.cureus.com/articles/4661-barriers-to-real-time-medical-direction-via-cellular-communication-for-prehospital-emergency-care-providers-in-gujarat-india>
74. Rout SK, Gabhale YR, Dutta A, Balakrishnan S, Lala MM, Setia MS, et al. Can telemedicine initiative be an effective intervention strategy for improving treatment compliance for pediatric HIV patients: Evidences on costs and improvement in treatment compliance from Maharashtra, India. Beck EJ, editor. *PLOS ONE*. 2019 Oct 8;14(10):e0223303.
75. Gupta N, Chawla N, Gupta D, Dhawan N, Janaki VR. Community Triage of Otolaryngology Patients Using a Store-and-Forward Telemedicine Device: A Feasibility Study. *Ear Nose Throat J*. 2020 Mar 22;014556132090895.
76. Thakar S, Rajagopal N, Mani S, Shyam M, Aryan S, Rao AS, et al. Comparison of telemedicine with in-person care for follow-up after elective neurosurgery: results of a cost-effectiveness analysis of 1200 patients using patient-perceived utility scores. *Neurosurg Focus*. 2018 May;44(5):E17.
77. Ravindran S, P LN, Channaveerachari NK, Seshadri SP, Kasi S, Manikappa SK, et al. Crossing barriers: Role of a tele-outreach program addressing psychosocial needs in the midst of COVID-19 pandemic. *Asian J Psychiatry*. 2020 Oct;53:102351.
78. Manjunatha N, Kumar C, Math S, Thirthalli J. Designing and implementing an innovative digitally driven primary care psychiatry program in India. *Indian J Psychiatry*. 2018;60(2):236.

79. Patro B, Tripathy J, De D, Sinha S, Singh A, Kanwar A. Diagnostic agreement between a primary care physician and a teledermatologist for common dermatological conditions in North India. *Indian Dermatol Online J.* 2015;6(1):21.
80. Mohanan M, Babiarz KS, Goldhaber-Fiebert JD, Miller G, Vera-Hernández M. Effect Of A Large-Scale Social Franchising And Telemedicine Program On Childhood Diarrhea And Pneumonia Outcomes In India. *Health Aff (Millwood).* 2016 Oct;35(10):1800–9.
81. Keeppanasserril A, Mathew A, Muddappa SC. Effectiveness of Tele-guided Interceptive Prosthodontic treatment in rural India: A comparative pilot study. *Online J Public Health Inform.* 2011 Nov 7;3(2). Available from: <http://www.uic.edu/htbin/cgiwrap/bin/ojs/index.php/ojphi/article/view/3800>
82. Patel A, Kuhite P, Puranik A, Khan SS, Borkar J, Dhande L. Effectiveness of weekly cell phone counselling calls and daily text messages to improve breastfeeding indicators. *BMC Pediatr.* 2018 Dec;18(1):337.
83. Acharya R, Rai J. Evaluation of patient and doctor perception toward the use of telemedicine in Apollo Tele Health Services, India. *J Fam Med Prim Care.* 2016;5(4):798.
84. Panda PK, Dawman L, Panda P, Sharawat IK. Feasibility and effectiveness of teleconsultation in children with epilepsy amidst the ongoing COVID-19 pandemic in a resource-limited country. *Seizure.* 2020 Oct;81:29–35.
85. Khanna M, Gowda GS, Bagevadi VI, Gupta A, Kulkarni K, Shyam RPS, et al. Feasibility and Utility of Tele-Neurorehabilitation Service in India: Experience from a Quaternary Center. *J Neurosci Rural Pract.* 2018 Oct;09(04):541–4.

- 835 86. Ragesh G, Ganjekar S, Thippeswamy H, Desai G, Hamza A, Chandra PS. Feasibility,  
836 Acceptability and Usage Patterns of a 24-Hour Mobile Phone Helpline Service for  
837 Women Discharged from a Mother-Baby Psychiatry Unit (MBU) in India. *Indian J*  
838 *Psychol Med.* 2020 Nov;42(6):530–4.
- 839 87. Verma N, Mishra S, Singh S, Kaur R, Kaur T, De A, et al. Feasibility, Outcomes, and  
840 Safety of Telehepatology Services During the COVID-19 Pandemic. *Hepatol*  
841 *Commun.* 2022 Jan;6(1):65–76.
- 842 88. Raman R, Bhojwani DN, Sharma T. How accurate is the diagnosis of diabetic  
843 retinopathy on telescreening? The Indian scenario. *Rural Remote Health.*  
844 2014;14(4):2809.
- 845 89. Ramkumar V, Nagarajan R, Shankarnarayan VC, Kumaravelu S, Hall JW.  
846 Implementation and evaluation of a rural community-based pediatric hearing screening  
847 program integrating in-person and tele-diagnostic auditory brainstem response (ABR).  
848 *BMC Health Serv Res.* 2019 Dec;19(1):1.
- 849 90. Meher SK, Biswas A, Ratha BK. Legal issues among doctors in the implementation of  
850 teleconsultation: a study at AIIMS, New Delhi, India. *Stud Health Technol Inform.*  
851 2013;192:1107.
- 852 91. Biswas S, Adhikari S, Gupta N, Garg R, Bharti S, Kumar V, et al. Smartphone-based  
853 telemedicine service at palliative care unit during nationwide lockdown: Our initial  
854 experience at a tertiary care cancer hospital. *Indian J Palliat Care.* 2020;26(5):31.
- 855 92. Angral S, Varshney S, Aanand P, Raj R. Tele Otology in India: Last 10 Years—A  
856 Scopic Review. *Indian J Otolaryngol Head Neck Surg.* 2022 Dec;74(S3):3776–88.

- 857 93. Ganapathy K, Alagappan D, Rajakumar H, Dhanapal B, Rama Subbu G, Nukala L, et al.  
858 Tele-Emergency Services in the Himalayas. *Telemed E-Health*. 2019 May;25(5):380–  
859 90.
- 860 94. Ganapathy K, Chawdhry V, Premanand S, Sarma A, Chandralekha J, Kumar KY, et al.  
861 Telemedicine in the Himalayas: Operational Challenges—A Preliminary Report.  
862 *Telemed E-Health*. 2016 Oct;22(10):821–35.
- 863 95. Naik SS, Rahul P, Harihara S, Pahuja E, Chithra NK, Ramachandraiah S, et al.  
864 Telephonic follow-up during COVID-19 to maintain continuity of care for persons with  
865 psychiatric disorders. *Asian J Psychiatry*. 2021 Mar;57:102564.
- 866 96. Nair PP, Aghoram R, Thomas B, Bharadwaj B, Chinnakali P. Video teleconsultation  
867 services for persons with epilepsy during COVID-19 pandemic: An exploratory study  
868 from public tertiary care hospital in Southern India on feasibility, satisfaction, and  
869 effectiveness. *Epilepsy Behav*. 2021 Apr;117:107863.
- 870 97. Philip S, Patley R, Chander R, Varshney P, Dosajh AC, Vinay B, et al. A report on  
871 successful introduction of tele mental health training for primary care doctors during the  
872 COVID 19 pandemic. *Asian J Psychiatry*. 2022 Feb;68:102967.
- 873 98. Shiva L, Desai G, Chand P, Ganjekar S, Vaiphei K, Satyanarayana VA, et al. A virtual  
874 course in perinatal mental health for healthcare professionals. *Asian J Psychiatry*. 2021  
875 Aug;62:102746.
- 876 99. Balasubramaniam SM, Bhargava S, Agrawal N, Asif R, Chawngthu L, Sinha P, et al.  
877 Blending virtual with conventional learning to improve student midwifery skills in  
878 India. *Nurse Educ Pract*. 2018 Jan;28:163–7.

- 879 100. Dhanasekaran K, Babu R, Kumar V, Mehrotra R, Hariprasad R. Capacity Building of  
880 Gynecologists in Cancer Screening Through Hybrid Training Approach. J Cancer Educ.  
881 2020 Dec;35(6):1243–9.
- 882 101. Ibrahim FA, Malathesh BC, Gajera G, Pandey P, Nirisha P L, Jyrwa S, et al.  
883 Chhattisgarh community mental healthcare tele-mentoring program (CHaMP): Digitally  
884 driven initiative to reach the unreached. Int J Soc Psychiatry. 2022 Aug;68(5):954–7.
- 885 102. Pahuja E, Kumar S, Kumar A, Uzzafar F, Sarkar S, Manjunatha N, et al. Collaborative  
886 Video Consultations from Tertiary Care Based Telepsychiatrist to a Remote Primary  
887 Care Doctor to Manage Opioid Substitution Therapy Clinic. J Neurosci Rural Pract.  
888 2020 Jun 12;11:498–501.
- 889 103. Mahapatra AK, Mishra SK, Kapoor L, Singh IP. Critical Issues in Medical Education  
890 and the Implications for Telemedicine Technology. Telemed E-Health. 2009  
891 Jul;15(6):592–6.
- 892 104. Lakshminarayanan M, Kathuria N, Mehra S. Delivery of perinatal mental health  
893 services by training lay counselors using digital platforms. Asian J Psychiatry. 2020  
894 Dec;54:102277.
- 895 105. Kumar Pm, Gottumukkala SruthimaNVS, Ramesh KsV, Bharath Ts, Penmetsa G,  
896 Kumar Cn. Effect of e-learning methods on Dental education: An observational study. J  
897 Educ Health Promot. 2020;9(1):235.
- 898 106. Priya H, Kharbanda OP, Agarwal D, Ivaturi A, Ravi P, Gupta A, et al. Effectiveness of a  
899 web-based learning module on oral health promotion for nursing and allied health  
900 professionals. Natl Med J India. 2021 Aug;34(4):232–4.



- 901 107. Mehrotra K, Chand P, Bandawar M, Rao Sagi M, Kaur S, G A, et al. Effectiveness of  
902 NIMHANS ECHO blended tele-mentoring model on Integrated Mental Health and  
903 Addiction for counsellors in rural and underserved districts of Chhattisgarh, India. Asian  
904 J Psychiatry. 2018 Aug;36:123–7.
- 905 108. Gautam S, Shukla A, Mishra N, Kohli M, Singh G. Effectiveness of virtual training for  
906 medical officers and community health officers in the critical care management of  
907 COVID-19 patients in the intensive care unit. Indian J Anaesth. 2021;65(16):168.
- 908 109. Manjunatha N, Sadh K, Shashidhara H, Manjunatha B, Shashank H, Ashwatha Kp, et al.  
909 Establishing performance indicators of telemedicine-based “On-Consultation Training”  
910 of primary care doctors: An innovation to integrate psychiatry at primary care. Indian J  
911 Community Med. 2021;46(1):75.
- 912 110. Chang LW, Kadam DB, Sangle S, Narayanan S, Borse RT, McKenzie-White J, et al.  
913 Evaluation of a Multimodal, Distance Learning HIV Management Course for Clinical  
914 Care Providers in India. J Int Assoc Physicians AIDS Care. 2012 Oct;11(5):277–82.
- 915 111. Sagi M, Aurobind G, Chand P, Ashfak A, Karthick C, Kubenthiran N, et al. Innovative  
916 telementoring for addiction management for remote primary care physicians: A  
917 feasibility study. Indian J Psychiatry. 2018;60(4):461.
- 918 112. Barik S, Paul S, Kandwal P. Insight into the changing patterns in clinical and academic  
919 activities of the orthopedic residents during COVID-19 pandemic: a cross-sectional  
920 survey. Knee Surg Sports Traumatol Arthrosc. 2020 Oct;28(10):3087–93.
- 921 113. Babu R, Dhanasekaran K, Mehrotra R, Hariprasad R. Leveraging Technology for  
922 Nation-Wide Training of Healthcare Professionals in Cancer Screening in India: a  
923 Methods Article. J Cancer Educ. 2021 Oct;36(5):950–6.

- 924 114. Ramanathan R, Aldis R, Gupta S, Desai M, Bollinger RC, Reed VA. Mixed methods  
925 evaluation of an international internet-based continuing medical education course for  
926 pediatric HIV providers in Pune, India. *Educ Health Abingdon Engl*. 2011  
927 Apr;24(1):540.
- 928 115. Thukral A, Sasi A, Chawla D, Datta P, Wahid S, Rao S, et al. Online Neonatal Training  
929 and Orientation Programme in India (ONTOP-IN)--The Way Forward for Distance  
930 Education in Developing Countries. *J Trop Pediatr*. 2012 Dec 1;58(6):486–90.
- 931 116. Nethan ST, Hariprasad R, Babu R, Kumar V, Sharma S, Mehrotra R. Project ECHO: a  
932 Potential Best-Practice Tool for Training Healthcare Providers in Oral Cancer Screening  
933 and Tobacco Cessation. *J Cancer Educ*. 2020 Oct;35(5):965–71.
- 934 117. Rao S, Rohilla KK, Kathrotia R, Naithani M, Varghese A, Bahadur A, et al. Rapid  
935 Workforce Development to Combat the COVID-19 Pandemic: Experience From a  
936 Tertiary Health Care Centre in North India. *Cureus*. 2021 Jun 11; Available from:  
937 [https://www.cureus.com/articles/59334-rapid-workforce-development-to-combat-the-](https://www.cureus.com/articles/59334-rapid-workforce-development-to-combat-the-covid-19-pandemic-experience-from-a-tertiary-health-care-centre-in-north-india)  
938 [covid-19-pandemic-experience-from-a-tertiary-health-care-centre-in-north-india](https://www.cureus.com/articles/59334-rapid-workforce-development-to-combat-the-covid-19-pandemic-experience-from-a-tertiary-health-care-centre-in-north-india)
- 939 118. Hariprasad R, Arora S, Babu R, Sriram L, Sardana S, Hanumappa S, et al. Retention of  
940 Knowledge Levels of Health Care Providers in Cancer Screening Through  
941 Telementoring. *J Glob Oncol*. 2018 Dec;(4):1–7.
- 942 119. Mahadevan S, Muralidhar K, Shetty D. Tele-Education Service Using Telemedicine  
943 Network in Healthcare Industry. *Telemed E-Health*. 2012 Nov;18(9):699–702.
- 944 120. Jain A, Agarwal R, Chawla D, Paul V, Deorari A. Tele-education vs classroom training  
945 of neonatal resuscitation: a randomized trial. *J Perinatol*. 2010 Dec;30(12):773–9.

- 946 121. Orsolini L, Jatchavala C, Noor IM, Ransing R, Satake Y, Shoib S, et al. Training and  
947 education in digital psychiatry: A perspective from ASIA-PACIFIC region. Asia-Pac  
948 Psychiatry. 2021 Dec;13(4):e12501.
- 949 122. Doherty M, Rayala S, Evans E, Rowe J, Rapelli V, Palat G. Using Virtual Learning to  
950 Build Pediatric Palliative Care Capacity in South Asia: Experiences of Implementing a  
951 Teleteaching and Mentorship Program (Project ECHO). JCO Glob Oncol. 2021  
952 Dec;(7):210–22.
- 953 123. Bhattarai D, Sharma A, Sengupta P. Utility and perceptions about web-based academics  
954 among physicians during COVID-19 pandemic. J Fam Med Prim Care. 2021;10(2):699.
- 955 124. Bansal M, Singh S, Maheshwari P, Adams D, McCulloch ML, Dada T, et al. Value of  
956 Interactive Scanning for Improving the Outcome of New-Learners in Transcontinental  
957 Tele-Echocardiography (VISION-in-Tele-Echo) Study. J Am Soc Echocardiogr. 2015  
958 Jan;28(1):75–87.
- 959 125. Braun R, Catalani C, Wimbush J, Israelski D. Community Health Workers and Mobile  
960 Technology: A Systematic Review of the Literature. Bullen C, editor. PLoS ONE. 2013  
961 Jun 12;8(6):e65772.
- 962 126. Deldar K, Bahaadinbeigy K, Tara SM. Teleconsultation and Clinical Decision Making:  
963 a Systematic Review. Acta Inform Medica AIM J Soc Med Inform Bosnia Herzeg Cas  
964 Drustva Za Med Inform BiH. 2016 Jul 16;24(4):286–92.
- 965 127. Lee Y, Raviglione MC, Flahault A. Use of Digital Technology to Enhance Tuberculosis  
966 Control: Scoping Review. J Med Internet Res. 2020 Feb 13;22(2):e15727.

- 967 128. Sharma P, Sethi MIS, Liem A, Bhatti HBS, Pandey V, Nair A. A Review of  
968 Telemedicine Guidelines in the South-East Asia Region. *Telemed Rep.* 2023 Sep  
969 1;4(1):271–8.
- 970 129. Al-Samarraie H, Ghazal S, Alzahrani AI, Moody L. Telemedicine in Middle Eastern  
971 countries: Progress, barriers, and policy recommendations. *Int J Med Inf.* 2020  
972 Sep;141:104232.
- 973 130. Bedi G, Vyas KS, Chung MT, Morrison SD, Asaad M, Mardini S. Telemedicine in  
974 International Cleft Care: A Systematic Review. *Cleft Palate-Craniofacial J Off Publ Am*  
975 *Cleft Palate-Craniofacial Assoc.* 2021 Dec;58(12):1547–55.
- 976 131. Dodoo JE, Al-Samarraie H, Alzahrani AI. Telemedicine use in Sub-Saharan Africa:  
977 Barriers and policy recommendations for Covid-19 and beyond. *Int J Med Inf.* 2021  
978 Jul;151:104467.
- 979 132. NSS 75th Round. Key Indicators of Social Consumption in India: Health. 2019 Nov,  
980 Available from:  
981 [https://www.mospi.gov.in/sites/default/files/NSS75250H/KI\\_Health\\_75th\\_Final.pdf](https://www.mospi.gov.in/sites/default/files/NSS75250H/KI_Health_75th_Final.pdf)
- 982 133. Joshi A, Malhotra B, Amadi C, Loomba M, Misra A, Sharma S, et al. Gender and the  
983 Digital Divide Across Urban Slums of New Delhi, India: Cross-Sectional Study. *J Med*  
984 *Internet Res.* 2020 Jun 22;22(6):e14714.
- 985 134. Sagaro GG, Battineni G, Amenta F. Barriers to Sustainable Telemedicine  
986 Implementation in Ethiopia: A Systematic Review. *Telemed Rep.* 2020;1(1):8–15.

135. Ag Ahmed MA, Gagnon MP, Hamelin-Brabant L, Mbemba GIC, Alami H. A mixed methods systematic review of success factors of mhealth and telehealth for maternal health in Sub-Saharan Africa. *mHealth*. 2017;3:22.
136. Kruse CS, Williams K, Bohls J, Shamsi W. Telemedicine and health policy: A systematic review. *Health Policy Technol*. 2021 Mar;10(1):209–29.
137. Share of government expenditure in total health expenditure increases from 28.6 per cent in FY14 to 40.6 per cent in. Available from: <https://pib.gov.in/pib.gov.in/Pressreleaseshare.aspx?PRID=1894902>
138. Call for proposals “the G20 Digital Innovation Alliance (G20-DIA) to recognize and support innovators that have digital solutions” by the MEITY | Principal Scientific Adviser. Available from: <https://www.psa.gov.in/innerPage/psa-initiatives-covid/call-proposals-g20-digital-innovation-alliance-g20-dia-recognize-and-support/4475>
139. Haleem A, Javaid M, Singh RP, Suman R. Telemedicine for healthcare: Capabilities, features, barriers, and applications. *Sens Int*. 2021;2:100117.
140. Goldenberg MG, Grantcharov TP. Enhancing Clinical Performance and Improving Patient Safety Using Digital Health. In: Rivas H, Wac K, editors. *Digital Health: Scaling Healthcare to the World*. Cham: Springer International Publishing; 2018. p. 235–48. (Health Informatics). Available from: [https://doi.org/10.1007/978-3-319-61446-5\\_17](https://doi.org/10.1007/978-3-319-61446-5_17)
141. Owoyemi A, Osuchukwu JI, Azubuike C, Ikpe RK, Nwachukwu BC, Akinde CB, et al. Digital Solutions for Community and Primary Health Workers: Lessons From Implementations in Africa. *Front Digit Health*. 2022 Jun 3;4:876957.

- 1009 142. Bronsoler A, Doyle J. The Impact of New Technology on the Healthcare Workforce.
- 1010 143. Gupta N, Gupta MK, Joshi NK, Mantri N, Sridevi G, Patel M, et al. Is telemedicine a
- 1011 holy grail in healthcare policy: clinicians' and patients' perspectives from an Apex
- 1012 Institution in Western India. BMC Health Serv Res. 2023 Feb 15;23(1):161.
- 1013 144. Zhu L, Jiang X, Cao J. Factors Affecting Continuance Intention in Non-Face-to-Face
- 1014 Telemedicine Services: Trust Typology and Privacy Concern Perspectives. Healthcare.
- 1015 2023 Jan 28;11(3):374.
- 1016 145. Senbekov M, Saliev T, Bukeyeva Z, Almabayeva A, Zhanaliyeva M, Aitenova N, et al.
- 1017 The Recent Progress and Applications of Digital Technologies in Healthcare: A Review.
- 1018 Fayn J, editor. Int J Telemed Appl. 2020 Dec 3;2020:1–18.
- 1019 146. Deldar K, Bahaadinbeigy K, Tara SM. Teleconsultation and Clinical Decision Making:
- 1020 a Systematic Review. Acta Inform Medica AIM J Soc Med Inform Bosnia Herzeg Cas
- 1021 Drustva Za Med Inform BiH. 2016 Jul 16;24(4):286–92.
- 1022 147. Almubarak H. The Potential Role of Telemedicine in Early Detection of Oral Cancer: A
- 1023 Literature Review. J Pharm Bioallied Sci. 2022 Jul;14(Suppl 1):S19–23.
- 1024 148. Barteit S, Guzek D, Jahn A, Bärnighausen T, Jorge MM, Neuhaan F. Evaluation of e-
- 1025 learning for medical education in low- and middle-income countries: A systematic
- 1026 review. Comput Educ. 2020 Feb;145:103726.
- 1027 149. Gross G, Ling R, Richardson B, Quan N. In-Person or Virtual Training?: Comparing the
- 1028 Effectiveness of Community-Based Training. Am J Distance Educ. 2023 Jan
- 1029 2;37(1):66–77.

- 1030 150. Vaona A, Banzi R, Kwag KH, Rigon G, Cereda D, Pecoraro V, et al. E-learning for  
1031 health professionals. *Cochrane Database Syst Rev*. 2018 Jan 21;1(1):CD011736.
- 1032 151. Sharma RS, Rohatgi A, Jain S, Singh D. The Ayushman Bharat Digital Mission  
1033 (ABDM): making of India's Digital Health Story. *CSI Trans ICT*. 2023 Apr;11(1):3–9.

Identification

Records identified from PubMed:  
Databases (n = 9884)

Records removed *before screening*:  
Duplicate records removed (n = 203)  
Records marked as ineligible by automation tools (n = 0)  
Records removed for other reasons (n = 0)

Screening

Records screened  
(n = 9681)

Reports sought for retrieval  
(n = 2967)

Reports assessed for eligibility  
(n = 2944)

Records excluded: n= 6714  
Inappropriate study design (n =439)  
Study setting outside India (n = 1900)  
Not on HRH cadre (n = 2647)  
Not about HR practice (n = 325)  
Not about Telehealth (n =1403)

Reports not retrieved  
Full text unavailable (n = 23)

Reports excluded:2838  
Not in English (n = 2)  
Inappropriate study design (n = 707)  
Study setting outside India (n = 254)  
Not on HRH cadre (n = 917)  
Not about HR practice (n = 958)

Included

Studies included in review  
(n = 106)



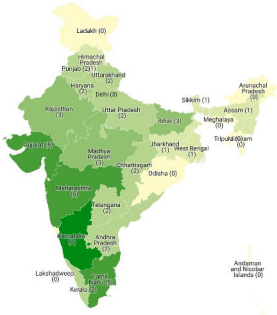

| Human Resource Related                                                                                                                                                                                                                                                                                                                                                                    | Application-related                                                                                                                                                                                                                                                                                                                                                                                                                                                                     | Technical                                                                                                                                                                                                            | Others                                                                                                                                                                                     |
|-------------------------------------------------------------------------------------------------------------------------------------------------------------------------------------------------------------------------------------------------------------------------------------------------------------------------------------------------------------------------------------------|-----------------------------------------------------------------------------------------------------------------------------------------------------------------------------------------------------------------------------------------------------------------------------------------------------------------------------------------------------------------------------------------------------------------------------------------------------------------------------------------|----------------------------------------------------------------------------------------------------------------------------------------------------------------------------------------------------------------------|--------------------------------------------------------------------------------------------------------------------------------------------------------------------------------------------|
| <ul style="list-style-type: none"> <li>• Prior training to use mhealth (13,20,23,25,26,32,37,41,42,44,46,49,50,52,55,57,60,62,63)</li> <li>• Additional technical support (25,32,39,40,46)</li> <li>• HCP with better relationship with the community (30,51)</li> <li>• Incentives for mhealth use (64,69)</li> <li>• Opportunity to HCW to get involved in patient care (21)</li> </ul> | <ul style="list-style-type: none"> <li>• Ease of using and adaptability of the intervention (20,21,23,25,29,37,38,41,42,48,52,67)</li> <li>• Interactive app with videos and images (21,23,34,39–41,44–46,49,60,67–69)</li> <li>• Use of local language (23,25,41,44,50,54,55,57,60)</li> <li>• Cost effectiveness of the intervention (31,37,38,55,56)</li> <li>• Offline content in the app (32,35,45)</li> <li>• An intervention that does not increase burden (24,39,40)</li> </ul> | <ul style="list-style-type: none"> <li>• Device availability (22,23,48,49,58,61)</li> <li>• Satellite connectivity (32,35,45)</li> <li>• Device with longer battery life and better functionality (23,42)</li> </ul> | <ul style="list-style-type: none"> <li>• Formative research to support fit with the context and population (29,32,44,48)</li> <li>• Government support for intervention (29,30)</li> </ul> |

| Human Resource-related                                                                                                                                                                                                                                                                                                                                                                                                                                                                                                                                                                                                                 | Application-related                                                                                                                                                                                                                                                                                                                                      | Technical                                                                                                                                                                                                                                                                                                         | Others                                                                                                                                                                                                                                                                |
|----------------------------------------------------------------------------------------------------------------------------------------------------------------------------------------------------------------------------------------------------------------------------------------------------------------------------------------------------------------------------------------------------------------------------------------------------------------------------------------------------------------------------------------------------------------------------------------------------------------------------------------|----------------------------------------------------------------------------------------------------------------------------------------------------------------------------------------------------------------------------------------------------------------------------------------------------------------------------------------------------------|-------------------------------------------------------------------------------------------------------------------------------------------------------------------------------------------------------------------------------------------------------------------------------------------------------------------|-----------------------------------------------------------------------------------------------------------------------------------------------------------------------------------------------------------------------------------------------------------------------|
| <ul style="list-style-type: none"> <li>• Low digital literacy (13,22,26,32,38,41,44,46,65,69)</li> <li>• Shortage of HCP (20,22,46,66,69)</li> <li>• Lack of awareness regarding app functions (20,21,31,32,68)</li> <li>• Lack of training or poor quality of training (21,22,26,66,69)</li> <li>• Lack of motivation or short-lasting interest (26,67)</li> <li>• Data safety and legal concerns (37,38,58)</li> <li>• Fear of internet addiction (65,68)</li> <li>• Difficulty in communication while using mHealth (38)</li> <li>• Lack of technical support (29)</li> <li>• Time constraints during high workload (20)</li> </ul> | <ul style="list-style-type: none"> <li>• Malfunctioning of the application (13,20–22,24,25,29,31,37,43,66,67,69)</li> <li>• Difficult to understand the language used in the application (20,21,25,34)</li> <li>• Difficulty in using the application (21,34,67)</li> <li>• Lack of interoperability between different mHealth tools. (29,69)</li> </ul> | <ul style="list-style-type: none"> <li>• Poor network (20–22, 24, 32, 34,38,41,44,47,53,55,67,69)</li> <li>• Malfunctioning of device (20,21,23–25, 42–44,67,69)</li> <li>• Lack of access to device (22,25,26,29,41, 68)</li> <li>• Poor infrastructure - lack of electricity, battery backup (22,69)</li> </ul> | <ul style="list-style-type: none"> <li>• Stigma related to the technology (13,38,68,69)</li> <li>• Stigma related to the disease worsening due to technology use (41,55,62)</li> <li>• Lack of human touch (34)</li> <li>• Lack of formative research (69)</li> </ul> |

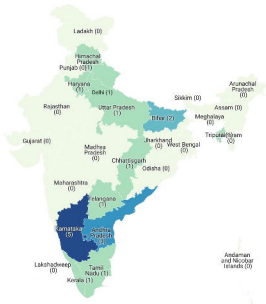

### Human Resource Related

- Prior training to use telemedicine (75,93)
- Additional technical support (76)

### Application-related

- Ease of using and adaptability of the intervention (92)
- Use of local language (89)
- Cost effectiveness of intervention (74,75,78,85,87,93,94)

### Technical

- Satellite connectivity (88)

| Human Resource-related                                                                                                                                                                                                                                                                                                                                                                                                                                       | Application-related                                                                                                                                                                                                                           | Technical                                                                                                                                                                                                                                                                 | Others                                                                                                                                                                                                                                                                  |
|--------------------------------------------------------------------------------------------------------------------------------------------------------------------------------------------------------------------------------------------------------------------------------------------------------------------------------------------------------------------------------------------------------------------------------------------------------------|-----------------------------------------------------------------------------------------------------------------------------------------------------------------------------------------------------------------------------------------------|---------------------------------------------------------------------------------------------------------------------------------------------------------------------------------------------------------------------------------------------------------------------------|-------------------------------------------------------------------------------------------------------------------------------------------------------------------------------------------------------------------------------------------------------------------------|
| <ul style="list-style-type: none"> <li>• Low digital literacy (72,76,94,95)</li> <li>• Difficulty in communication while using telemedicine (76,83,86,87,93, 95)</li> <li>• Shortage of HCP (77,78,92,93)</li> <li>• Data safety and legal concerns (72,85,90,94)</li> <li>• Lack of motivation or short-lasting interest (74)</li> <li>• Lack of training or poor quality of training (72)</li> <li>• Time constraints during high workload (73)</li> </ul> | <ul style="list-style-type: none"> <li>• Malfunctioning of the application (81,83,93)</li> <li>• Difficult to understand the language used in the application (84,86,87,92,93)</li> <li>• Difficulty in using the application (96)</li> </ul> | <ul style="list-style-type: none"> <li>• Poor network (73,76,81,84,87, 92,94,96)</li> <li>• Malfunctioning of device (76,81,92)</li> <li>• Lack of access to device (84,86,95,96)</li> <li>• Poor infrastructure - lack of electricity, battery backup (92–94)</li> </ul> | <ul style="list-style-type: none"> <li>• Lack of human touch (77,80,83,91,95)</li> <li>• Stigma related to the technology (94)</li> <li>• Unstable patients could not be managed (77,86,87)</li> <li>• Difficult to track progress of patients (75,82,85,91)</li> </ul> |

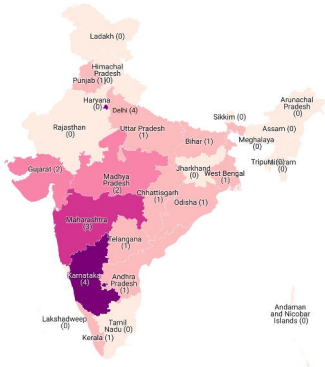

### Human Resource Related

- Prior training to use tele-education (102,118)

### Application-related

- Ease of using and adaptability of the intervention (112,122)
- Interactive app with videos and images (117)
- Use of local language (113,118)
- Cost effectiveness of intervention (101)

### Technical

- Device availability (110,118)

### Others

- Formative research to support fit with the context and population (104)



### Human Resource-related

- Low digital literacy (104,115)
- Difficulty in communication while using tele-education (123)
- Shortage of HCP (107,117)
- Lack of motivation or short-lasting interest (105,112,113)
- Lack of training or poor quality of training (99)
- Lack of technical support (117)

### Application-related

- Malfunctioning of the application (111,113)
- Difficult to understand the language used in the application (111,114)

### Technical

- Poor Network (98–100, 103, 104,109,111,113,117,120,122)
- Malfunctioning of device (114,119)
- Lack of access to device (99)
- Poor infrastructure - lack of electricity, battery backup (117)

### Others

- Stigma related to the technology (99,105)
- Stigma related to the disease worsening due to technology use (114)
- Difficult to keep track of participants (108,113,120)
